# ASSESSING CONFIDENCE IN THE RESULTS OF NETWORK META- ANALYSIS (CINEMA)

Adriani Nikolakopoulou<sup>1</sup>, Julian PT Higgins<sup>2</sup>, Theodore Papakonstantinou<sup>1</sup>, Anna  
Chaimani<sup>3,4,5</sup>, Cinzia Del Giovane<sup>6</sup>, Matthias Egger<sup>1</sup>, Georgia Salanti<sup>1</sup>.

<sup>1</sup> Institute of Social and Preventive Medicine, University of Bern, Switzerland

<sup>2</sup> Population Health Sciences, Bristol Medical School, University of Bristol, Bristol, U.K.

<sup>3</sup> School of Medicine, Paris Descartes University, Paris, France.

<sup>4</sup> INSERM, UMR1153 Epidemiology and Statistics, Sorbonne Paris Cité Research  
Center, Paris, France.

<sup>5</sup> French Cochrane Center, Hôpital Hôtel-Dieu, Paris, France.

<sup>6</sup> Institute of Primary Health Care (BIHAM), University of Bern, Bern, Switzerland.

*6138 words*

*5 tables, 4 figures, 2 boxes*

22        **Abstract**

23

24        Evaluation of the credibility of results from a meta-analysis has become an intrinsic  
25 part of the evidence synthesis process. We present a methodological framework to evaluate  
26 Confidence In the results from Network Meta-Analysis (CINeMA) when multiple  
27 interventions are compared. CINeMA considers six domains and we outline the methods  
28 used to form judgements about within-study bias, across-studies bias, indirectness,  
29 imprecision, heterogeneity and incoherence. Key to judgements about within-study bias and  
30 indirectness is the percentage contribution matrix, which shows how much information  
31 each study contributes to the results from network meta-analysis. The use of contribution  
32 matrix allows the semi-automation of the process, implemented in a freely available web  
33 application ([cinema.ispm.ch](http://cinema.ispm.ch)). In evaluating imprecision, heterogeneity and inconsistency we  
34 consider the impact of these components of variability in forming clinical decisions. Via  
35 three examples, we show that CINeMA improves transparency and avoids the selective use  
36 of evidence when forming judgements, thus limiting subjectivity in the process. CINeMA is  
37 easy to apply even in large and complicated networks, like a network involving 18 different  
38 antidepressant drugs.

39

## 40 INTRODUCTION

41 Network meta-analysis has become an increasingly popular tool for developing  
42 treatment guidelines and making recommendations on reimbursement. However, less than  
43 one per cent of published network meta-analyses assess the credibility of their conclusions  
44 (1). The Grading of Recommendations Assessment, Development and Evaluation (GRADE)  
45 approach requires such an assessment of the confidence in the results from systematic  
46 reviews and meta-analyses, and many organizations, including the World Health  
47 Organization (WHO), have adopted the GRADE approach (2,3). Based on GRADE, two  
48 systems have been proposed to evaluate the credibility of results from network meta-  
49 analyses (4,5). However, the complexity of the methods and lack of suitable software have  
50 limited their uptake.

51 In this article we introduce the methodology underpinning the CINeMA approach  
52 (Confidence In Network Meta-Analysis), and present the advances that have recently been  
53 implemented in a freely available web application (*cinema.ispm.ch*) (6). CINeMA is based on  
54 the GRADE framework, with several conceptual and semantic differences (5). It covers six  
55 confidence domains: within-study bias (referring to the impact of risk of bias in the included  
56 studies), across-studies bias (referring to publication and other reporting bias), indirectness,  
57 imprecision, heterogeneity and incoherence. CINeMA assigns judgements at three levels (no  
58 concerns, some concerns or major concerns) to each of the six domains. Judgements across  
59 the six domains are then summarized to obtain four levels of confidence for each relative  
60 treatment effect, corresponding to the usual GRADE approach: very low, low, moderate or  
61 high.

62 Most network meta-analyses include only randomized controlled trials (RCTs), so we  
63 will focus on this study design, and on relative treatment effects. A network meta-analysis  
64 involves the integration of direct and indirect evidence in a network of relevant trials. We  
65 assume that evaluation of the credibility of results takes place once all primary analyses and  
66 sensitivity analyses have been undertaken. We assume that reviewers have implemented  
67 their pre-specified study inclusion criteria, which may include risk of bias considerations,  
68 and have obtained the best possible estimates of relative treatment effects using  
69 appropriate statistical methods (e.g. those described in (7–10)). The question is then how to  
70 make judgements about the credibility of relative treatment effects, given that trials with  
71 variable risk of bias, precision, relevance and heterogeneity contribute information to the  
72 estimate.

73 This paper addresses how judgements should be formed about the six CINeMA  
74 domains. We illustrate the methods using three examples: a network of trials that compare  
75 outcomes of various diagnostic strategies in patients with suspected acute coronary  
76 syndrome (11), a network of trials comparing the effectiveness of 18 antidepressants for  
77 major depression (12), and a network comparing adverse events of statins (13). The three  
78 examples are introduced in **Error! Reference source not found.** All analyses were done in R  
79 software using the *netmeta* package and the CINeMA web application (Box 2) (6,14).

## 80 **WITHIN-STUDY BIAS**

### 81 **BACKGROUND AND DEFINITIONS**

82 Within-study bias refers to shortcomings in the design or conduct of a study that can  
83 lead to an estimated relative treatment effect that systematically differs from the truth. In

84 our framework we assume that studies have been assessed for risk of bias. The majority of  
85 published systematic reviews of RCTs currently use a tool developed by Cochrane to  
86 evaluate risk of bias (15). This tool classifies studies as having low, unclear or high risk of  
87 bias for various bias components (such as allocation concealment, attrition, blinding etc.),  
88 and these judgements are then summarized across domains. A revision of the tool takes a  
89 similar approach but labels the levels as low risk of bias, some concerns and high risk of bias  
90 (16).

## 91 **THE CINEMA APPROACH**

92 While it is straightforward to gauge the impact of within-study biases on the summary  
93 relative treatment effect in a pairwise meta-analysis (17), in network meta-analysis studies  
94 contribute data to the estimation of each summary effect in a complex manner. In the first  
95 example discussed below we show the complexity underpinning the flow of information in  
96 the network of diagnostic modalities used to detect coronary artery disease. A treatment  
97 comparison directly evaluated in studies with low risk of bias might also be estimated  
98 indirectly (via a common comparator) using studies at high risk of bias, and vice versa. While  
99 studies at low risk of bias are expected to provide more credible results, it is often  
100 impractical to restrict the analysis to such studies. The treatment comparison of interest  
101 might not have been tested directly in any trial, or tested in only a few small trials with high  
102 risk of bias. Thus, even when direct evidence is present, judgements about the relative  
103 treatment effect cannot ignore the risk of bias in the studies providing indirect evidence.

104 If direct evidence is supplemented by indirect evidence via exactly one intermediate  
105 comparator, the risk of bias in such a one-step loop is considered along with the direct  
106 evidence. In complex networks, indirect evidence is often obtained via several routes,

107 including one-step loops and loops involving several steps (see example). In general, it is not  
108 desirable to derive judgements by considering only the risk of bias in studies in a single one-  
109 step loop (4,18). This is because most studies in a network contribute *some* indirect  
110 information to every estimate of a relative treatment effect. Studies contribute more when  
111 their results are precise (e.g. large studies), when they provide direct evidence or when the  
112 indirect evidence does not involve many “steps”. For example, studies in a one-step indirect  
113 comparison contribute more than studies of the same precision in a two-step indirect  
114 comparison. We can quantify the contribution made by each study to each relative  
115 treatment effect on a 0 to 100 percent scale. These quantities can be written as a  
116 ‘percentage contribution matrix’, as shown elsewhere (19).

117 CINeMA combines the studies’ contributions with the risk of bias judgements to  
118 evaluate study limitation for each estimate of a relative treatment effect from a network  
119 meta-analysis. It uses the percentage contribution matrix to approximate the contribution  
120 of each study and then stratifies the percentage contribution from studies judged to be at  
121 low, moderate and high risk of bias. Using different colors, study limitations in direct  
122 comparisons can be shown graphically in the network plot, while study limitations in the  
123 estimates from a network meta-analysis are presented for each comparison in bar charts.

#### 124 **EXAMPLE: COMPARING DIAGNOSTIC MODALITIES TO DETECT CORONARY ARTERY DISEASE**

125 Consider the comparison of Exercise ECG versus Standard care (Box 1). The direct  
126 evidence from a single study is at low risk of bias (3-arm study 12); so there are no study  
127 limitations when interpreting the direct odds ratio of 0.42 (Table 1). However, the odds ratio  
128 0.52 from the network meta-analysis is estimated also by using indirect information via  
129 seven studies that compare standard care and CCTA and one study comparing exercise ECG

130 and CCTA. Additionally, we have indirect evidence via stress echo. The risk of bias in these  
131 eleven studies providing indirect evidence varies. Every study in the two one-step loops  
132 contributes information proportional to its precision (the inverse of the squared standard  
133 error, largely driven by sample size). Consequently, some judgement about study limitations  
134 for the indirect evidence can be made by considering that there is a large amount of  
135 information from studies at high risk of bias (2162 participants randomized) and low risk of  
136 bias (2788 participants) and relatively little information from studies at moderate risk of bias  
137 (362 participants). Direct evidence from the small study number 12 (130 participants) at low  
138 risk of bias is considered separately, as it has greater influence than the indirect evidence.

139 Calculations become more complicated because studies in the indirect comparisons  
140 contribute information not only proportional to their study precision but also to their  
141 location in the network. Indirect evidence about exercise ECG versus SPECT-MPI comes from  
142 two one-step loops (via CCTA or via Standard Care) and three two-step loops (via CCTA-  
143 Standard Care, Stress Echo-Standard Care, Standard Care-CCTA) ([Figure 1A](#)). In each loop of  
144 evidence, a different subgroup of studies contributes indirect information and their sizes  
145 and risks of bias vary. For the odds ratio from the network meta-analysis comparing exercise  
146 ECG and SPECT-MPI, study 2 with sample size 400 will be more influential than study 8 (with  
147 sample size 1392) because study 2 contributes one-step indirect evidence (via standard  
148 care).

149 [Table 2](#) shows the percentage contribution matrix for the network and the columns  
150 represent the studies, grouped by comparison. The rows represent all relative treatment  
151 effects from network meta-analysis. The matrix entries show how much each study  
152 contributes to the estimation of each relative treatment effect. This information combined  
153 with the risk of bias judgements can be presented as a bar chart, as shown in [Figure 2](#). Now,

154 it is much easier to judge study limitations for each odds ratio; the larger the contribution  
155 from studies at high or moderate risk of bias, the more concerned we are about study  
156 limitations. Using this graph, we can infer that the total evidence from the network meta-  
157 analysis for the comparison of exercise ECG with SPECT-MPI involves low, moderate and  
158 high risk of bias studies with percentages 44%, 32% and 24%, respectively.

159 The CINeMA software offers the option to automate production of judgments, based  
160 on the data presented in these bar graphs combined with specific rules. One possible rule is  
161 to compute a weighted average level of risk of bias, assigning scores of -1, 0 and 1 to low,  
162 moderate and high risk of bias. For the comparison exercise ECG vs SPECT-MPI, this would  
163 produce a weighted score of  $0.44 \times (-1) + 0.32 \times 0 + 0.24 \times 1 = -0.20$ , which corresponds to  
164 some concerns in the scoring scheme.

#### 165 **EXAMPLE: COMPARING ANTIDEPRESSANTS**

166 We will focus on evaluating the results for three comparisons; amitriptyline vs  
167 milnacipran (one direct study at low and one at moderate risk of bias), mirtazapine versus  
168 paroxetine (three direct studies at low risk of bias and two at moderate) and amitriptyline vs  
169 clomipramine (no direct studies). The odds ratios for treatment response are presented in  
170 Table 3. We use this example to illustrate the use of sensitivity analysis and how it can  
171 inform the amount of contribution of studies at moderate and high risk of bias that we can  
172 tolerate.

173 For the first two treatment comparisons in Table 3, the contribution from studies at  
174 low risk of bias is more than 50%. Moreover, the sensitivity analysis excluding studies at  
175 moderate risk of bias provides results comparable to those obtained from all studies. Thus,  
176 one can derive the judgment of no concerns for amitriptyline versus milnacipran and



177 mirtazapine versus paroxetine. However, the estimation of the relative treatment effect of  
178 amitriptyline versus clomipramine comes by more than 60% from studies at moderate risk  
179 of bias. Given also that the odds ratio from the sensitivity analysis is quite different from to  
180 the one obtained from all studies, we judge as some concerns the amitriptyline versus  
181 clomipramine comparison.

## 182 **ACROSS-STUDIES BIAS**

### 183 **BACKGROUND AND DEFINITIONS**

184 Across-studies bias occurs when the studies included in the systematic review are not  
185 a representative sample of the studies undertaken. This phenomenon can be the result of  
186 the suppression of statistically significant (or “negative”) findings (publication bias), their  
187 delayed publication (time-lag bias) or omission of unfavorable study results (outcome  
188 reporting bias). The presence and the impact of such biases has been well documented (20–  
189 26). Across-studies bias is a missing data problem, and hence it is impossible to conclude  
190 with certainty for or against its presence in a given dataset. Consequently, and in agreement  
191 with the GRADE system, CINeMA assumes two possible descriptions for across-studies bias:  
192 suspected and undetected.

### 193 **THE CINEMA APPROACH**

194 Assessment of the risk of across-studies bias follows considerations on pairwise meta-  
195 analysis (27). Conditions associated with ‘suspected’ across-studies bias include:  
196 - Failure to include unpublished data and data from grey literature.

197 - The meta-analysis is based on a small number of positive early findings, for example for  
198 a drug newly introduced on the market (as early evidence is likely to overestimate its  
199 efficacy and safety) (27).

200 - The treatment comparison is studied exclusively or primarily in industry-funded trials  
201 (28,29).

202 - There is previous evidence documenting the presence of reporting bias. For example the  
203 study by Turner et al. documented publication bias in placebo-controlled antidepressant  
204 trials (30).

205 Across-studies bias is considered 'undetected' when

206 - Data from unpublished studies have been identified and their findings agree with those  
207 in published studies

208 - There is a tradition of prospective trial registration in the field and protocols or clinical  
209 trial registries do not indicate important discrepancies with published reports

210 - Empirical examination of patterns of results between small and large studies, using the  
211 comparison-adjusted funnel plot (31,32), regression models (33) or selection models  
212 (34) do not indicate that results from small studies differ from those in published  
213 studies.

#### 214 **EXAMPLE: COMPARING ANTIDEPRESSANTS**

215 The literature search retrieved supplementary and unpublished information from  
216 clinical trial registries, regulatory agencies' repositories and drug companies' websites  
217 (particularly for the newest and most recently marketed antidepressants). Results from  
218 published and unpublished studies did not differ materially, no asymmetry was observed in  
219 the funnel plot (12) and meta-regression did not indicate an association between study

220 precision and study odds ratio. However, the authors decided that they cannot completely  
221 rule out the possibility that some studies are missing because the field of antidepressant  
222 trials has been shown to be prone to publication bias. Consequently, the review team  
223 decided to assume that across-studies bias was 'suspected' for all drug comparisons.

## 224 **INDIRECTNESS**

### 225 **BACKGROUND AND DEFINITIONS**

226 Systematic reviews are based on a focused research question, with a clearly defined  
227 population, intervention and setting of interest. In the GRADE framework for pairwise meta-  
228 analysis, indirectness refers to the relevance of the included studies to the research  
229 question (35). Study populations, interventions, outcomes and study settings should match  
230 the inclusion criteria of the systematic review but might not be representative of the  
231 settings, populations or outcomes about which reviewers want to make inferences. For  
232 example, a systematic review aiming to provide evidence about treating middle-aged adults  
233 might identify studies in elderly patients; these studies will have an indirect relevance.

### 234 **THE CINEMA APPROACH**

235 We suggest that each study included in the network is evaluated according to its  
236 relevance to the research question and classified into low, moderate or high indirectness.  
237 Note that only participant, intervention and outcome characteristics that are likely  
238 associated with the relative effect of an intervention against another (that is, effect  
239 modifying variables) should be considered. Then, the study-level judgments can be  
240 combined with the percentage contribution matrix to produce a bar plot similar to the one  
241 presented in [Figure 2](#). Evaluation of indirectness for each relative treatment effect can then

242 proceed by judging whether the contribution from studies of high or moderate indirectness  
243 is important.

244 This approach also addresses the assumption of transitivity in network meta-analysis.  
245 Transitivity assumes that we can learn about the relative treatment effect of, say treatment  
246 A versus treatment B from an indirect comparison via C. This holds when the distributions of  
247 all effect modifiers are comparable in A versus C and B versus C studies. Differences in the  
248 distribution of effect modifiers across studies and comparisons will indicate intransitivity.  
249 Evaluation of the distribution of effect modifiers is only possible when enough studies are  
250 available per comparison. Consequently, the proposed approach will not address  
251 intransitivity in sparse networks (when there are few studies compared to the total number  
252 of treatments). Assessment of transitivity will be challenging or impossible for interventions  
253 that are poorly connected to the network. A further potential obstacle is that details of  
254 important effect modifiers might not always be reported in trial reports. For these reasons,  
255 we recommend that the network structure and the amount of available data are  
256 considered, and that judgments are on the side of caution, as highlighted in the following  
257 example.

#### 258 **EXAMPLE: COMPARING ANTIDEPRESSANTS**

259 Cipriani et al concluded that there is no indirectness in any of the studies included and  
260 that the distribution of modifiers was similar across studies and comparisons (12). However,  
261 they decided to downgrade evidence about drugs that are poorly connected to the network.  
262 For example, vortioxetine was examined in a single study and consequently it was difficult  
263 to assess the comparability of effect modifiers in the comparisons with vortioxetine.

264 Consequently, Cipriani et al. voiced concerns about indirectness for all comparisons with  
265 vortioxetine.

## 266 **IMPRECISION**

### 267 **BACKGROUND AND DEFINITIONS**

268 One of the key advantages of network meta-analysis compared to pairwise meta-  
269 analysis is the ability to gain precision (36): adding indirect evidence on a particular  
270 treatment comparison on top of direct evidence leads to narrower confidence intervals than  
271 using the direct evidence alone. However, in network meta-analysis treatment effects are  
272 also estimated with uncertainty, typically expressed as 95% confidence intervals that give an  
273 indication of where the true effect is likely to lie. To evaluate imprecision it is customary to  
274 define relative treatment effects that exclude any clinically important differences in  
275 outcomes between interventions (26). At its simplest, this treatment effect might  
276 correspond to no effect (0 on an additive scale, 1 on a ratio scale). This would mean that  
277 even a small difference is considered important, leading to one treatment being preferred  
278 over another. Alternatively, ranges may be defined that divide relative treatment effects  
279 into three categories: 'in favour of A', 'no important difference between A and B', and 'in  
280 favour of B'. The middle range is the 'range of equivalence', which includes treatment  
281 effects that correspond to clinically unimportant differences between interventions. The  
282 range of equivalence can be symmetrical (when a clinically important difference is defined,  
283 and its reciprocal constitutes the clinically important difference in the opposite direction) or  
284 asymmetrical (when clinically important differences vary by direction of effect). For  
285 simplicity, we will assume symmetrical ranges of equivalence.

## 286 THE CINEMA APPROACH

287 The approach to imprecision consists of comparing the range of treatment effects  
288 included in the 95% confidence interval with the range of equivalence. If the 95%  
289 confidence interval extends to differences in treatment effects that would lead to different  
290 conclusions, for example covering two or all three of the categories defined above, then the  
291 results would be considered imprecise, reducing confidence in the treatment effect  
292 estimate. [Figure 3](#) shows a hypothetical forest plot that illustrates the CINeMA rules to  
293 assess imprecision of network treatment effect estimates for an odds ratio of 0.8. ‘Major  
294 concerns’ are assigned to NMA treatment effects with 95% confidence intervals that cross  
295 both limits of the range of equivalence, ‘some concerns’ if only the lower or the upper limit  
296 of the range of equivalence is crossed and ‘no concerns’ apply to estimates that do not cross  
297 either value.

## 298 EXAMPLE: ADVERSE EVENTS OF STATINS

299 Consider the network comparing adverse events of different statins, introduced in [Box](#)  
300 [1](#) and shown in [Figure 1C](#) (37). Let us assume a range of equivalence such that an odds ratio  
301 greater than 1.05 or below  $0.95 \left(\frac{1}{1.05}\right)$  would lead to favouring one the two treatments. Odds  
302 ratios between 0.95 and 1.05 would be interpreted as no important differences in the safety  
303 profile of the two statins. The 95% confidence interval of pravastatin versus rosuvastatin is  
304 quite wide, including odds ratios from 1.09 to 1.82 ([Figure 4](#)), but any treatment effect in  
305 this range would lead to the conclusion that pravastatin is safer than rosuvastatin. Thus, in  
306 this case the imprecision does not reduce the confidence that can be placed in the  
307 comparison of pravastatin with rosuvastatin (‘no concerns’). The 95% confidence interval of  
308 pravastatin versus simvastatin is slightly wider (0.84 to 1.42) and, more importantly, the

309 interval covers all three areas, i.e. favouring pravastatin, favouring simvastatin and no  
310 important difference. This result is very imprecise, and a rating of ‘major concerns’ applies.  
311 The comparison of rosuvastatin versus simvastatin is more certain, but it is again unclear  
312 which drug has fewer adverse effects: most estimates within the 95% confidence interval  
313 favour simvastatin, but the interval crosses into the range of equivalence. A rating of ‘some  
314 concerns’ will be appropriate here.

### 315 **EXAMPLE: EFFICACY OF ANTIDEPRESSANTS**

316 In the network of antidepressants, the authors defined clinically important effects as  
317 an odds ratio smaller than 0.8 and larger than its reciprocal 1.25 (12). We use this range of  
318 equivalence (0.8 to 1.25) in this example. We will concentrate on three comparisons,  
319 clomipramine versus fluvoxamine, citalopram versus venlafaxine and amitriptyline versus  
320 paroxetine ([Table 4](#)). The 95% confidence interval of the odds ratio comparing clomipramine  
321 with fluvoxamine (0.75 to 1.32) includes clinically important effects in both directions,  
322 implying large uncertainty in which drug should be favored (‘major concerns’) ([Table 5](#)). The  
323 odds ratio for citalopram versus venlafaxine is 1.12 (95% confidence interval 0.90 to 1.39),  
324 favoring venlafaxine, but the interval includes values within the range of equivalence. The  
325 verdict therefore is ‘some concerns’. Finally, the odds ratio of amitriptyline versus  
326 paroxetine is 0.96 (95% confidence interval 0.82 to 1.13) in favor of amitriptyline. Despite  
327 the fact that the estimate includes 1, it is not imprecise because the 95% confidence interval  
328 is within the range of equivalence (‘no concerns’).

329

330

## 331 HETEROGENEITY

### 332 BACKGROUND AND DEFINITIONS

333 Variability in the results of studies contributing to a particular comparison influences  
334 the confidence we have in the result for that comparison. If this variability reflects genuine  
335 differences between studies, rather than random variation, it is usually referred to as  
336 heterogeneity. The GRADE system for pairwise meta-analysis uses the term inconsistency to  
337 describe such variability (38). In network meta-analysis, there may be variation in the  
338 relative treatment effects between studies within a comparison, i.e. heterogeneity, or  
339 variation between direct and indirect sources of evidence across comparisons, i.e.  
340 incoherence (39–42) which we discuss in the next paragraph. The two notions are closely  
341 related; incoherence can be seen as a special form of heterogeneity.

342 There are several ways of measuring heterogeneity in a set of trials. The variance of  
343 the distribution of the underlying treatment effects ( $\tau^2$ ), is a useful measure of the  
344 magnitude of heterogeneity. One can estimate heterogeneity variances from each pairwise  
345 meta-analysis and, under the usual assumption of a single variance across comparisons, a  
346 common heterogeneity variance for the whole network. The magnitude of  $\tau^2$  is usefully  
347 expressed in a prediction interval, which shows where the true effect of a new study similar  
348 to the existing studies is expected to lie (28).

### 349 THE CINEMA APPROACH

350 Similarly to imprecision, the CINeMA approach to heterogeneity considers its  
351 influence on clinical conclusions. Large variability in the included studies does not  
352 necessarily affect conclusions, while even small amounts of heterogeneity may be important  
353 in some cases. The concordance between assessments based on confidence intervals (which



354 do not capture heterogeneity) and prediction intervals (which do capture heterogeneity)  
355 can be used to assess the importance of heterogeneity. For example, a prediction interval  
356 may include values that would lead to different conclusions than suggested by the CI; in  
357 such a case, heterogeneity would be considered having important implications. The  
358 hypothetical forest plot of [Figure 3](#) serves as an illustration of the CINeMA rules to assess  
359 heterogeneity of treatment effects for a clinically important odds ratio of below 0.8 or  
360 above 1.25.

361         With only a handful of trials, one cannot adequately estimate the amount of  
362 heterogeneity: prediction intervals derived from meta-analyses with very few studies can be  
363 unreliable. In this situation it may be more reasonable to interpret an estimate of  
364 heterogeneity (and its uncertainty) using empirical distributions. Turner et al. and Rhodes et  
365 al. analyzed many meta-analyses of binary and continuous outcomes, categorized them  
366 according to the outcome and type of intervention and comparison, and derived empirical  
367 distributions of heterogeneity values (16, 17). These empirical distributions can help to  
368 interpret the magnitude of heterogeneity, complementary to considerations based on  
369 prediction intervals.

#### 370         **EXAMPLE: ADVERSE EVENTS OF STATINS**

371         In the statins example ([Figure 1C](#)), we assumed that the range of equivalence was  
372 0.95 to 1.05. The prediction interval of pravastatin versus simvastatin is wide ([Figure 4](#)).  
373 However, the confidence interval for this comparison already extended into clinically  
374 important effects in both directions; thus, the implications of heterogeneity is not important  
375 and does not change the conclusion. The confidence interval for pravastatin versus  
376 rosuvastatin lies entirely above the equivalence range and is consequently considered

377 sufficiently precise. However, the corresponding prediction interval crosses both boundaries  
378 (0.95 and 1.05), and we therefore would have ‘major concerns’ about the impact of  
379 heterogeneity. Similar considerations result in ‘some concerns’ regarding heterogeneity for  
380 the comparison rosuvastatin versus simvastatin.

### 381 **EXAMPLE: EFFICACY OF ANTIDEPRESSANTS**

382 In the antidepressants network, the estimated amount of heterogeneity is small  
383 ( $\tau^2 = 0.03$ ). The prediction interval for clomipramine versus fluvoxamine does not add  
384 further uncertainty to clinical conclusions beyond that already represented by the  
385 confidence interval (Table 4), so we have ‘no concerns’ about heterogeneity for that  
386 comparison (Table 5). The prediction interval of citalopram versus venlafaxine extend into  
387 clinically important effects in both directions (0.74 to 1.70) while the confidence interval  
388 does not extend into values in favour of citalopram, thus suggesting potential implications  
389 of heterogeneity (‘some concerns’). We have ‘major concerns’ about the impact of  
390 heterogeneity for the comparison amitriptyline versus paroxetine, since the confidence  
391 interval lies entirely within the range of equivalence, whereas the prediction interval  
392 includes clinically important effects in favour of both treatments (0.65, 1.42).

## 393 **INCOHERENCE**

### 394 **BACKGROUND AND DEFINITIONS**

395 The assumption of transitivity stipulates that we can compare two treatments  
396 indirectly via an intermediate treatment node. Incoherence is the statistical manifestation  
397 of intransitivity; if transitivity holds, the direct and indirect evidence will be in agreement  
398 (45,46). Conversely, if estimates from direct and indirect evidence disagree we conclude

399 that transitivity does not hold. There are two approaches to quantifying incoherence. The  
400 first comprises methods that examine the agreement between direct and indirect evidence  
401 for specific comparisons in the network, while the second includes methods that examine  
402 incoherence in the entire network. SIDE (Separate Indirect from Direct Evidence) or “node  
403 splitting” (39)) is an example of the first set of methods, which are often referred to as local  
404 methods. It compares direct and indirect evidence for each comparison and computes an  
405 inconsistency factor with a confidence interval. The inconsistency factor is calculated as the  
406 difference of the two estimates for an additive measure (e.g. log odds ratio, log risk ratio,  
407 standardized mean difference) or as the ratio of the two estimates for measures on the  
408 ratio scale. This method can be applied to comparisons that are informed by both direct and  
409 indirect evidence. Consider for example the hypothetical example in [Figure 3](#) (Incoherence,  
410 Scenario A). The studies directly comparing the two treatments result in a direct odds ratio  
411 of 1.75 (1.5 to 2) while the rest studies of the network that provide indirect evidence to the  
412 particular comparison gives an indirect odds ratio of 1.37 (1.2 to 1.55). The disagreement  
413 between direct and indirect odds ratios is expressed as the ‘inconsistency factor’ (1.27)  
414 which can be used to construct a confidence interval (1.05 to 1.55) and a test statistic, here  
415 resulting to a p-value of 0.07. A simpler version of SIDE splitting considers a single loop in  
416 the network (loop-specific approach (47)). The second set of methods are global methods  
417 that model all treatment effects and all possible inconsistency factors simultaneously,  
418 resulting in an omnibus test of incoherence in the whole network. The design-by-treatment  
419 interaction test is such a global method for incoherence (41,42). An overview of other  
420 methods for testing incoherence can be found elsewhere (40,48).  
421

## 422 THE CINEMA APPROACH

423 Both global and local incoherence tests have low power (49,50) and it is therefore  
424 important to consider the inconsistency factors as well as their uncertainty. As a large  
425 inconsistency factor may be indicative of a biased direct or indirect estimate, judging its  
426 magnitude is always important. As for imprecision and heterogeneity, the CINeMA approach  
427 to incoherence considers the impact on clinical conclusions, based on visual inspection of  
428 the 95% confidence interval of direct and indirect odds ratios and the range of equivalence.  
429 Consider the hypothetical examples in [Figure 3](#) (Incoherence). The inconsistency factor  
430 using the SIDE splitting approach is the same for the three examples (1.27 with confidence  
431 interval 1.05 to 1.55), but their position relative to the range of equivalence differs and  
432 affects the interpretation of incoherence. In the first example, the 95% confidence intervals  
433 of both direct and indirect odds ratios lie above the range of equivalence: treatment A is  
434 clearly favourable, and there are 'no concerns' regarding inconsistency. In the second  
435 example, the 95% confidence interval of the indirect odds ratio straddles the range of  
436 equivalence while for the direct odds ratio the 95% confidence interval lies entirely above  
437 1.05. In this situation, a judgement of 'some concerns' is appropriate. In the third example,  
438 the odds ratios from direct and indirect comparisons are in opposite directions and the  
439 disagreement will therefore lead to an expression of 'major concerns'.

440 Note that in the three hypothetical examples above, both direct and indirect  
441 estimates exist. It could be, however, that there is only direct (e.g. venlafaxine versus  
442 vortioxetine in the network of antidepressants) or only indirect (e.g. agomelatine versus  
443 vortioxetine) evidence. In this situation, we can neither estimate an inconsistency factor nor  
444 judge potential implications with respect to the range of equivalence. Considerations of  
445 indirectness and intransitivity are nevertheless important. Statistically, incoherence can only

446 be judged using the global design-by-treatment interaction test. When a comparison is  
447 informed only by direct evidence, no disagreement between sources of evidence occurs and  
448 thus ‘no concerns’ for incoherence apply. If only indirect evidence is present then there will  
449 always be ‘some concerns’. There will be ‘major concerns’ if the p-value of the design-by-  
450 treatment interaction test is  $<0.01$ . As in comparisons informed only by indirect evidence  
451 coherence cannot be tested, having ‘no concerns’ for the particular treatment effects would  
452 be difficult to defend.

### 453 **EXAMPLE: COMPARING ANTIDEPRESSANTS**

454 In the network of antidepressants, the direct odds ratio comparing clomipramine with  
455 fluvoxamine is almost double the indirect odds ratio: the ratio of the two odds ratios (i.e.,  
456 the inconsistency factor) is 1.94 (95% confidence interval 0.65 to 5.73, [Table 4](#)). However,  
457 both direct and indirect estimates contain values that extend to clinically important values  
458 in both directions. Thus, incoherence will not affect the interpretation of the NMA  
459 treatment effect: there are ‘no concerns’ ([Table 5](#)). In contrast, there are ‘major concerns’  
460 regarding the confidence in the citalopram versus venlafaxine comparison: the direct odds  
461 ratio contains values within and above the range of equivalence while the indirect odds  
462 ratio includes values within and below the range of equivalence. The resulting estimated  
463 ratio of odds ratios is 2.08 (95% confidence interval 1.03 to 4.18) and the respective p-value  
464 of the SIDE test is 0.04 ([Table 4](#)). For the comparisons of amitriptyline versus paroxetine, the  
465 ratio of direct to indirect odds ratios is 1.05 (with 95% confidence interval (0.76, 1.46) and p-  
466 value 0.75) implying that the two sources of evidence are in agreement ([Table 4](#)). Direct and  
467 indirect estimates are very close in terms of odds ratios, 95% confidence intervals and the

468 range of equivalence and we therefore have ‘no concerns’ regarding incoherence for this  
469 particular comparison.

## 470 **SUMMARIZING JUDGMENTS ACROSS THE SIX DOMAINS**

471 The output of the CINeMA framework is a table with the level of concern for each of  
472 the six domains. Some of the domains are interconnected: factors that may reduce the  
473 confidence in a treatment effect may affect more than one domain. Indirectness includes  
474 considerations on intransitivity, which manifest itself in the data as statistical incoherence.  
475 Heterogeneity may be related to most of the other domains. Pronounced heterogeneity will  
476 increase imprecision in treatment effects and may be related to variability in within-study  
477 biases or the presence of publication bias. Finally, in the presence of heterogeneity the  
478 ability to detect important incoherence will decrease (49).

479 Although the final output of CINeMA is a table with the level of concern for each of  
480 the six domains, reviewers may choose to summarize judgements across domains. If such an  
481 overall assessment is required, one may use the four levels of confidence using the usual  
482 GRADE approach: ‘very low’, ‘low’, ‘moderate’ or ‘high’ (24). For this purpose, an initial  
483 strategy would be to start at ‘high’ confidence and to drop a rating for each domain with  
484 some concerns and to drop two levels for each domain with major concerns. However, the  
485 six CINeMA domains should be considered jointly rather than in isolation, avoiding  
486 downgrading the overall level of confidence more than once for related concerns. For  
487 example, for the ‘citalopram versus venlafaxine’ comparison, we have ‘some concerns’ for  
488 imprecision and heterogeneity and ‘major concerns’ for incoherence (Table 3). However,  
489 downgrading by two levels will be sufficient in this situation, because imprecision,  
490 heterogeneity and incoherence are interconnected.

## 491        **DISCUSSION**

492            We have outlined and illustrated the CINeMA approach for evaluating confidence in  
493 treatment effect estimates from NMA, covering the six domains of within-study bias, across-  
494 study bias, indirectness, imprecision, heterogeneity and incoherence. Our approach avoids  
495 selective use of indirect evidence, while considering the characteristics of all studies  
496 included in the network. Thus, we are not using assessments of confidence to decide  
497 whether to present direct or indirect (or combined) evidence, as has been suggested by  
498 others (4,5). We differentiate between the three sources of variability in a network, namely,  
499 imprecision, heterogeneity and incoherence and we consider the impact that each source  
500 might have on decisions for treatment. The approach can be operationalized and is easy-to-  
501 implement even for very large networks.

502            Any approach to evaluating confidence in evidence synthesis results will inevitably  
503 involve some subjectivity. Our approach is no exception. While the use of bar charts to infer  
504 about the impact of within study biases and indirectness provides a consistent assessment  
505 across all comparisons in the network, their summary is difficult. Setting up a margin of  
506 equivalence might be equivocal. Further limitations of the framework are associated with  
507 the fact that published articles are used to make judgements and these reports do not  
508 necessarily reflect the way studies were undertaken. For instance, judging indirectness  
509 requires study data to be collected on pre-specified effect modifiers; reporting limitations  
510 will inevitably impact on the reliability of the judgements.

511            A consequence of the inherent subjectivity of the system is that interrater  
512 agreement may be modest. Studies of the reproducibility of assessments made by  
513 researchers using CINeMA will be required in this context. We believe however that

514 transparency is key. Although judgements may differ across reviewers, they are made using  
515 explicit criteria. These should be specified in the review protocol so that data-driven  
516 decisions are avoided. The web application at *cinema.ispm.ch* will greatly facilitate the  
517 implementation of all steps involved in the application of CINeMA (6).

518         This paper proposes a refinement of a previously suggested framework (51). An  
519 alternative approach has also been refined (52) since its initial introduction (53). The two  
520 methods have similarities but also notable differences. For example, Puhan et al (53)  
521 suggest a process of deciding whether indirect estimates are of sufficient certainty to  
522 combine them with the direct estimates. In contrast CINeMA evaluates relative treatment  
523 effects without considering separately the direct and indirect sources. Evaluation of the  
524 impact of within-study bias and indirectness differs materially between the two approaches.  
525 The need to choose the most influential one-step loop in the GRADE approach as described  
526 by Puhan et al. (53) and Brignardello-Petersen (18) discards a large amount of information  
527 that contributes to the results and makes the approach difficult to apply to large networks.  
528 The percentage contribution matrix appears to be the only viable option to acknowledge  
529 the impact of each and every study included in a network. Moreover, our framework  
530 naturally includes the results from sensitivity analyses in the interpretation of the bar  
531 charts. Finally, in contrast to GRADE approach, we do not rely on metrics for judging  
532 heterogeneity and incoherence: we consider instead the impact that these can have when a  
533 stakeholder needs to make informed decisions. An alternative approach to assessing  
534 confidence findings from network meta-analysis is to explore how robust treatment  
535 recommendations are to potential degrees of bias in the evidence (54). The method is easy  
536 to apply but focuses on the impact of bias and does not explicitly address heterogeneity,  
537 indirectness and inconsistency.



538 Evidence synthesis is increasingly used by national and international agencies (55,56)  
539 to inform decisions about the reimbursement of medical interventions, by clinical guideline  
540 panels to recommend one drug over another and by clinicians to prescribe a treatment or  
541 recommend a diagnostic procedure for individual patients. However, it is the exception  
542 rather than the rule for published network meta-analyses to formally evaluate confidence in  
543 relative treatment effects (57). With the use of open-source free software (see Box 2), our  
544 approach can be routinely applied to any network meta-analysis (6) and offers a step  
545 forward in transparency and reproducibility. The suggested framework operationalizes,  
546 simplifies and accelerates the process of evaluation of results from large and complex  
547 networks without compromising in statistical and methodological rigor. The CINeMA  
548 framework is a transparent, rigorous and comprehensive system for evaluating the  
549 confidence of treatment effect estimates from network meta-analysis.  
550

551 **Box 1. Description of three network meta-analyses used to illustrate the CINeMA**  
552 **approach to assess confidence in network meta-analysis.**

553 **Diagnostic strategies for patients with low risk of acute coronary syndrome**

554 Siontis et al performed a network meta-analysis to of randomized trials to evaluate the  
555 differences between the non-invasive diagnostic modalities used to detect coronary artery  
556 disease in patients presenting with symptoms suggestive of acute coronary syndrome (11).  
557 Differences between the diagnostic modalities were evaluated with respect to the number  
558 of downstream referrals for invasive coronary angiography and other clinical outcomes. For  
559 outcome referrals, 18 studies were included. The network is presented in [Figure 1A](#) and the  
560 data in [Table S1](#). The results from the network meta-analysis are presented in [Table 1](#).

561 **Antidepressants for moderate and major depression**

562 Cipriani et al compared 18 commonly prescribed antidepressants, which were studied in  
563 179 head-to-head randomized trials involving patients diagnosed with major/moderate  
564 depression (12). The primary efficacy outcome was response measured as 50% reduction in  
565 the symptoms scale between baseline and 8 weeks of follow-up. According to the inclusion  
566 criteria specified in the protocol only studies at low or moderate risk of bias were included  
567 (58). The methodological and statistical details presented in the published article and its  
568 appendix. Here, we will focus on how judgements about credibility of the results were  
569 derived. The network is presented in [Figure 1B](#) and the data is available in Mendeley Data  
570 (DOI:10.17632/83rthbp8ys.2).

571 **Comparative tolerability and harms of statins**

572 The aim of the systematic review by Naci et al. (37) was to determine the comparative  
573 tolerability and harms of eight statins. The outcome considered here is the number of  
574 patients who discontinued therapy due to adverse effects, measured as an odds ratio. This

575 outcome was evaluated in 101 studies. The network is presented in Figure 1C and the  
576 outcome data are given in Table S4. The results of the network meta-analysis are presented  
577 in Table S5 and the results from SIDE splitting in Table S6.

578

579 **Box 2. Description of the CINeMA web-application.**

580 **THE CINeMA WEB APPLICATION**

581 CINeMA framework has been implemented in a freely available, user-friendly web-  
582 application aiming to facilitate the evaluation of confidence on the results from network  
583 meta-analysis (<http://cinema.ispm.ch/> (6)). The web application is programmed in  
584 javascript, uses docker and is linked with R; in particular, packages *meta* and *netmeta* are  
585 used (59). Knowledge of the aforementioned languages and technologies is however not  
586 required from the users.

587 **Loading the data**

588 In 'My Projects' tab, CINeMA users are able to upload a .csv file with the by-treatment  
589 outcome study data and study-level risk of bias (RoB) and indirectness judgments. CINeMA  
590 web-application can handle all the formats used in network meta-analysis (long or wide  
591 format, binary or continuous, arm level or study level data) and provides flexibility in  
592 labelling variables as desired by the user. A demo dataset is available in 'My Projects' tab.

593 **Evaluating the confidence in the results from network meta-analysis**

594 A preview of the evidence (network plot and outcome data) and options concerning the  
595 analysis (fixed or random effects, effect measure etc.) are given in the 'Configuration' tab.  
596 The next six tabs guide users to make informed conclusions on the quality of evidence based  
597 on within-study bias, across-studies bias, indirectness, imprecision, heterogeneity and  
598 incoherence. Features implemented include the percentage contribution matrix, relative

599 treatment effects for each comparison, estimation of the heterogeneity variance, prediction  
600 intervals and tests for the evaluation of the assumption of coherence.

601 **Summarising judgments**

602 The last tab 'Report' includes a summary of the evaluations made in the six domains and  
603 gives users the possibility to either not downgrade, or downgrade by one or two levels each  
604 relative treatment effect. Users can download a report with the summary of their  
605 evaluations along with their final judgements. CINeMA is accompanied by a documentation  
606 describing each step in detail (tab 'Documentation').

607

608

609 **Table 1. Results from pairwise (upper triangle) and network meta-analysis (lower triangle) from**  
 610 **the network of non-invasive diagnostic strategies for the detection of coronary artery disease in**  
 611 **Figure 1A. Odds ratios and their 95% confidence intervals are presented for referrals for invasive**  
 612 **coronary angiography. Odds ratios in the lower triangle less than one favor the strategy in the**  
 613 **column; odds ratios in the upper triangle less than one favor the strategy in the row. Cells with a**  
 614 **dot indicate that no direct studies examine the particular comparison.**

|                       |                       |                       |                       |                       |                       |
|-----------------------|-----------------------|-----------------------|-----------------------|-----------------------|-----------------------|
| <b>CCTA</b>           | .                     | 2.25<br>[1.04 - 4.90] | 1.04<br>[0.70 - 1.55] | 1.23<br>[1.00 - 1.50] | .                     |
| 3.07<br>[1.46 - 6.45] | <b>CMR</b>            | .                     | .                     | 0.38<br>[0.18 - 0.78] | .                     |
| 2.24<br>[1.22 - 4.11] | 0.73<br>[0.28 - 1.88] | <b>Exercise ECG</b>   | .                     | 0.42<br>[0.14 - 1.30] | 1.93<br>[1.39 - 2.67] |
| 1.27<br>[1.01 - 1.60] | 0.42<br>[0.20 - 0.87] | 0.57<br>[0.30 - 1.07] | <b>SPECT-MPI</b>      | 0.87<br>[0.71 - 1.06] | .                     |
| 1.17<br>[0.97 - 1.40] | 0.38<br>[0.18 - 0.78] | 0.52<br>[0.28 - 0.96] | 0.92<br>[0.76 - 1.10] | <b>Standard Care</b>  | 2.95<br>[0.97 - 8.98] |
| 4.31<br>[2.23 - 8.32] | 1.40<br>[0.53 - 3.74] | 1.93<br>[1.39 - 2.66] | 3.38<br>[1.71 - 6.68] | 3.69<br>[1.90 - 7.17] | <b>Stress Echo</b>    |

615 *ECG: electrocardiogram; echo: echocardiography; SPECT-MPI: single photon emission computed*  
 616 *tomography-myocardial perfusion imaging; CCTA: coronary computed tomographic angiography;*  
 617 *CMR: cardiovascular magnetic resonance.*

**Table 2. The percentage contribution matrix for the network presented in Figure 1A. The columns refer to the studies (grouped by comparison) and the rows refer to the relative treatment effects (grouped into mixed and indirect evidence) from network meta-analysis. The entries show how much each study contributes (as percentage) to the estimation of relative treatment effects.**

| Direct comparisons (number of studies) | CCTA vs Exercise ECG (1) | CCTA vs SPECT-MPI (2) |          | CCTA vs Standard care (7) |           |           |           |          |          |          | CMR vs Standard care (2) |          | Exercise ECG vs Standard care (1) |           | Exercise ECG vs Stress Echo (4) |           |           |           | SPECT-MPI vs Standard care (2) |           | Standard care vs Stress Echo (1) |
|----------------------------------------|--------------------------|-----------------------|----------|---------------------------|-----------|-----------|-----------|----------|----------|----------|--------------------------|----------|-----------------------------------|-----------|---------------------------------|-----------|-----------|-----------|--------------------------------|-----------|----------------------------------|
|                                        |                          | 2                     | 9        | 1                         | 10        | 13        | 14        | 4        | 7        | 8        | 11                       | 6        | 12                                | 12        | 15                              | 16        | 17        | 18        | 5                              | 12        |                                  |
| <b>NMA Estimates/study IDs</b>         | <b>3</b>                 | <b>2</b>              | <b>9</b> | <b>1</b>                  | <b>10</b> | <b>13</b> | <b>14</b> | <b>4</b> | <b>7</b> | <b>8</b> | <b>11</b>                | <b>6</b> | <b>12</b>                         | <b>12</b> | <b>15</b>                       | <b>16</b> | <b>17</b> | <b>18</b> | <b>5</b>                       | <b>12</b> |                                  |
| <b>Mixed estimates</b>                 |                          |                       |          |                           |           |           |           |          |          |          |                          |          |                                   |           |                                 |           |           |           |                                |           |                                  |
| CCTA:Exercise ECG                      | 52                       | 1                     | 1        | 3                         | 0         | 3         | 1         | 3        | 4        | 4        | 0                        | 0        | 14                                | 0         | 3                               | 0         | 2         | 1         | 1                              | 6         |                                  |
| CCTA:SPECT-MPI                         | 1                        | 18                    | 16       | 5                         | 1         | 5         | 1         | 6        | 7        | 7        | 0                        | 0        | 0                                 | 0         | 0                               | 0         | 0         | 22        | 10                             | 0         |                                  |
| CCTA:Standard care                     | 1                        | 4                     | 4        | 13                        | 2         | 13        | 3         | 15       | 18       | 17       | 0                        | 0        | 1                                 | 0         | 0                               | 0         | 0         | 6         | 3                              | 0         |                                  |
| CMR:Standard care                      | 0                        | 0                     | 0        | 0                         | 0         | 0         | 0         | 0        | 0        | 0        | 60                       | 40       | 0                                 | 0         | 0                               | 0         | 0         | 0         | 0                              | 0         |                                  |
| Exercise ECG:Standard care             | 23                       | 1                     | 1        | 3                         | 0         | 3         | 1         | 4        | 5        | 4        | 0                        | 0        | 30                                | 1         | 6                               | 1         | 3         | 2         | 1                              | 11        |                                  |
| Exercise ECG:Stress Echo               | 1                        | 0                     | 0        | 0                         | 0         | 0         | 0         | 0        | 0        | 0        | 0                        | 0        | 1                                 | 5         | 52                              | 8         | 29        | 0         | 0                              | 2         |                                  |
| SPECT-MPI:Standard care                | 0                        | 5                     | 4        | 1                         | 0         | 1         | 0         | 2        | 2        | 2        | 0                        | 0        | 0                                 | 0         | 0                               | 0         | 0         | 57        | 26                             | 0         |                                  |
| Standard care:Stress Echo              | 14                       | 1                     | 1        | 2                         | 0         | 2         | 1         | 2        | 3        | 3        | 0                        | 0        | 14                                | 2         | 16                              | 2         | 9         | 1         | 1                              | 27        |                                  |
| <b>Indirect estimates</b>              | --                       | --                    | --       | --                        | --        | --        | --        | --       | --       | --       | --                       | --       | 0                                 | 0         | --                              | --        | --        | --        | --                             | 0         |                                  |
| CCTA:CMR                               | 1                        | 3                     | 2        | 6                         | 1         | 7         | 2         | 8        | 9        | 8        | 28                       | 19       | 1                                 | 0         | 0                               | 0         | 0         | 4         | 2                              | 0         |                                  |
| CCTA:Stress Echo                       | 24                       | 1                     | 1        | 3                         | 0         | 3         | 1         | 3        | 4        | 4        | 0                        | 0        | 8                                 | 2         | 18                              | 3         | 10        | 1         | 1                              | 13        |                                  |
| CMR:Exercise ECG                       | 16                       | 1                     | 1        | 2                         | 0         | 2         | 1         | 3        | 3        | 3        | 22                       | 15       | 15                                | 0         | 4                               | 1         | 2         | 1         | 1                              | 7         |                                  |
| CMR:SPECT-MPI                          | 0                        | 3                     | 3        | 1                         | 0         | 1         | 0         | 1        | 1        | 1        | 28                       | 19       | 0                                 | 0         | 0                               | 0         | 0         | 28        | 13                             | 0         |                                  |
| CMR:Stress Echo                        | 11                       | 1                     | 1        | 1                         | 0         | 2         | 0         | 2        | 2        | 2        | 20                       | 14       | 9                                 | 1         | 11                              | 2         | 6         | 1         | 0                              | 13        |                                  |
| Exercise ECG:SPECT-MPI                 | 21                       | 7                     | 6        | 1                         | 0         | 1         | 0         | 1        | 2        | 2        | 0                        | 0        | 15                                | 0         | 4                               | 1         | 2         | 20        | 9                              | 7         |                                  |
| SPECT-MPI:Stress Echo                  | 14                       | 5                     | 4        | 1                         | 0         | 1         | 0         | 1        | 1        | 1        | 0                        | 0        | 9                                 | 1         | 13                              | 2         | 7         | 19        | 9                              | 13        |                                  |

*ECG: electrocardiogram; echo: echocardiography; SPECT-MPI: single photon emission computed tomography-myocardial perfusion imaging; CCTA: coronary computed tomographic angiography; CMR: cardiovascular magnetic resonance.*

**Table 3. Summary odds ratios from network meta-analysis comparing six antidepressants and sensitivity analyses excluding studies at moderate risk of bias.**

| Comparison                        | Response odds ratio [95% confidence interval] |                                                     |
|-----------------------------------|-----------------------------------------------|-----------------------------------------------------|
|                                   | <i>All studies<br/>(179 studies)</i>          | <i>Studies at low risk of bias<br/>(83 studies)</i> |
| Amitriptyline versus Milnacipran  | 1.11 [0.85; 1.43]                             | 1.10 [0.77; 1.59]                                   |
| Mirtazapine versus Paroxetine     | 1.07 [0.88; 1.30]                             | 1.08 [0.83; 1.39]                                   |
| Amitriptyline versus Clomipramine | 1.24 [0.97; 1.59]                             | 0.96 [0.59; 1.57]                                   |



**Table 4. Results from direct, indirect and mixed evidence along with confidence and prediction intervals and incoherence ratio of odds ratios for the network of antidepressants. Odds ratios lower than 1 favour the first treatment.**

| Comparison                         | Direct OR<br>(95% CI)  | Indirect OR<br>(95% CI) | Ratio of ORs<br>(95% CI) | NMA OR<br>(95% CI)     | 95% PrI of<br>NMA OR |
|------------------------------------|------------------------|-------------------------|--------------------------|------------------------|----------------------|
| Clomipramine versus<br>Fluvoxamine | 1.85<br>(0.65 to 5.27) | 0.96<br>(0.71 to 1.29)  | 1.94<br>(0.65 to 5.73)   | 0.99<br>(0.75 to 1.32) | (0.63 to 1.57)       |
| Citalopram versus<br>Venlafaxine   | 1.72<br>(0.89 to 3.32) | 0.83<br>(0.66 to 1.04)  | 2.08<br>(1.03 to 4.18)   | 1.12<br>(0.90 to 1.39) | (0.74 to 1.70)       |
| Amitriptyline versus<br>Paroxetine | 1.07<br>(0.85 to 1.36) | 1.02<br>(0.82 to 1.27)  | 1.05<br>(0.76 to 1.46)   | 0.96<br>(0.82 to 1.13) | (0.65 to 1.42)       |

NMA: network meta-analysis, OR: odds ratio, PrI: prediction interval, CI: confidence interval.

**Table 5. Level of concern for three network meta-analysis odds ratios from the network of antidepressants for the domains imprecision, heterogeneity and incoherence. See Table 4 for odds ratios.**

| <b>Comparison</b>               | <b>Imprecision</b> | <b>Heterogeneity</b> | <b>Incoherence</b> |
|---------------------------------|--------------------|----------------------|--------------------|
| Clomipramine versus Fluvoxamine | Major concerns     | No concerns          | No concerns        |
| Citalopram versus Venlafaxine   | Some concerns      | Some concerns        | Major concerns     |
| Amitriptyline versus Paroxetine | No concerns        | Major concerns       | No concerns        |

**Figure 1. Network plots of the three network meta-analyses used as examples. The width of the edges are proportional to the number of patients randomised in each comparison. A: Network of randomised controlled trials comparing non-invasive diagnostic strategies for the detection of coronary artery disease in patients with low risk acute coronary syndrome. The colours of edges and nodes refer to the risk of bias; low (green), moderate (yellow) and red (high). In square brackets are the study IDs as presented in Table S1. B: Network of randomised controlled trials comparing active antidepressants in patients with moderate/major depression. The colours of edges refer to the risk of bias; low (green), moderate (yellow) and red (high). The size of nodes is proportional to the number of studies examining each treatment. C: Network of randomised controlled trials comparing statins with respect to adverse effects.**

*ECG: electrocardiogram; echo: echocardiography; SPECT-MPI: single photon emission computed tomography-myocardial perfusion imaging; CCTA: coronary computed tomographic angiography; CMR: cardiovascular magnetic resonance.*

**A**

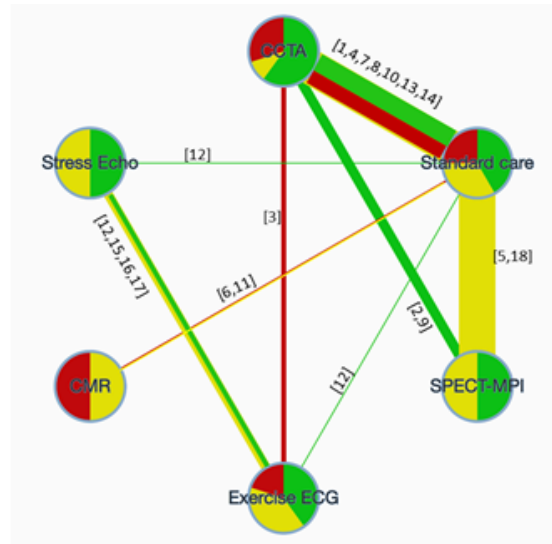

**B**

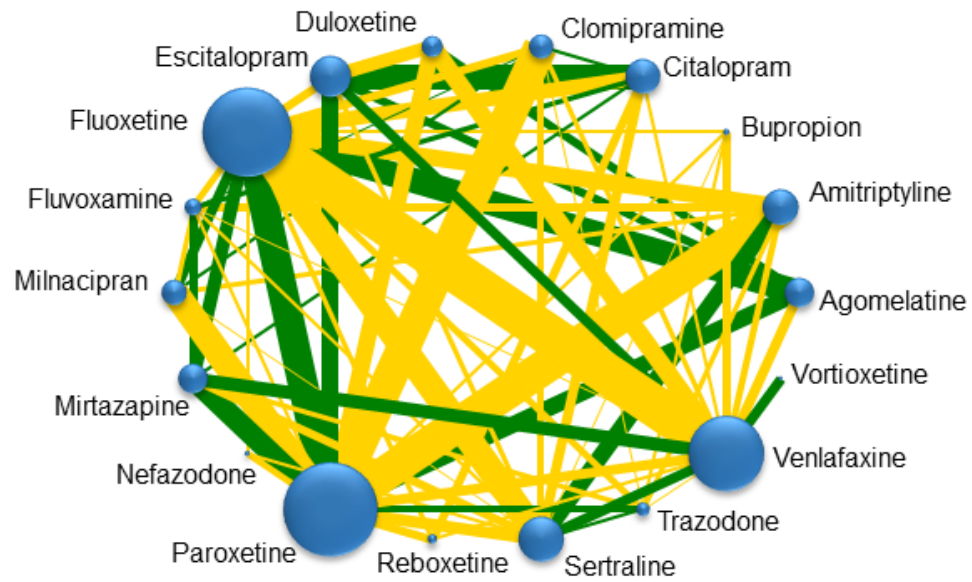

**C**

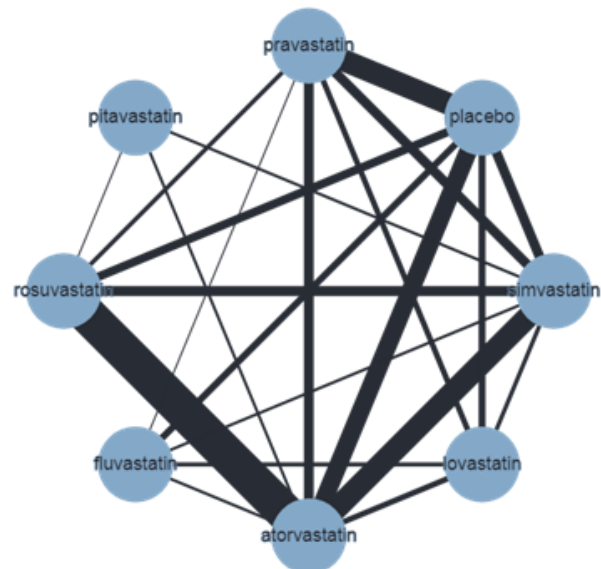

**Figure 2. Risk of bias bar chart for the comparison of non-invasive diagnostic strategies for the detection of coronary artery disease. Each bar represents a relative treatment effect estimated using the data in the network in Error! Reference source not found.A. White vertical lines indicate the percentage contribution of separate studies. Each bar shows the percentage contribution from studies judged to be at low (green), moderate (yellow) and high (red) risk of bias.**

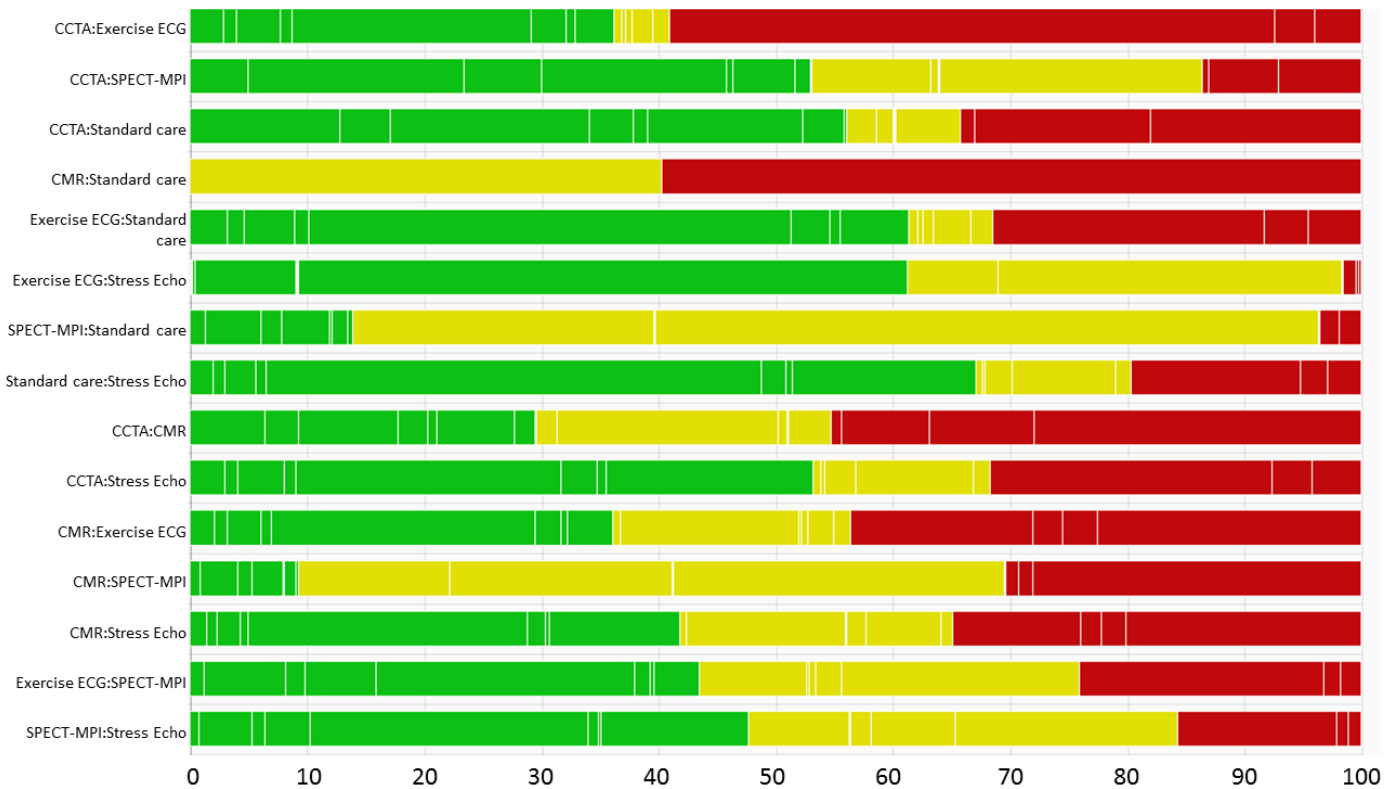

*ECG: electrocardiogram; echo: echocardiography; SPECT-MPI: single photon emission computed tomography-myocardial perfusion imaging; CCTA: coronary computed tomographic angiography; CMR: cardiovascular magnetic resonance.*

**Figure 3. CINeMA rules to assess imprecision, heterogeneity and incoherence of network treatment effects. The range of equivalence is from 0.8 to 1.25. Black lines indicate confidence intervals and red lines indicate prediction intervals. For the three scenarios presented for incoherence, inconsistency factor is 1.27 (1.05 to 1.55).**

OR: odds ratio.

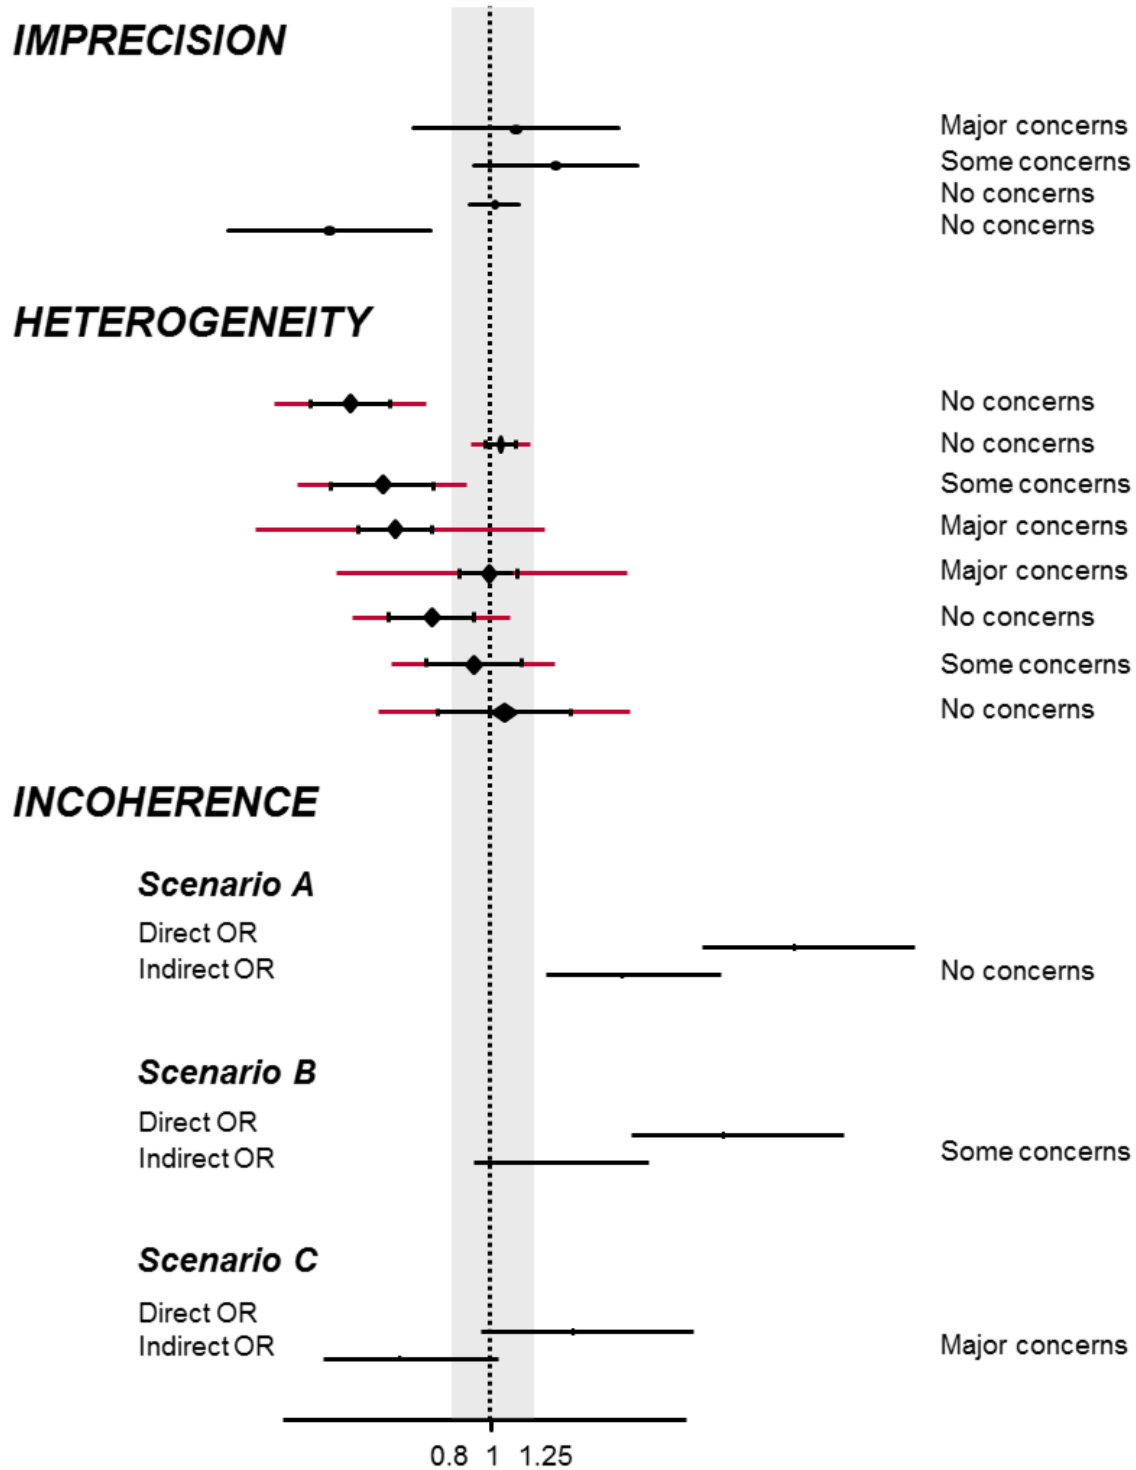

**Figure 4. Network meta-analysis odds ratios from the network of statins their 95% confidence intervals (black lines) and their 95% prediction intervals (red lines). The range of equivalence is from 0.95 to 1.05.**

*Pri*: 95% prediction interval, *CI*: 95% confidence interval, *vs*: versus.

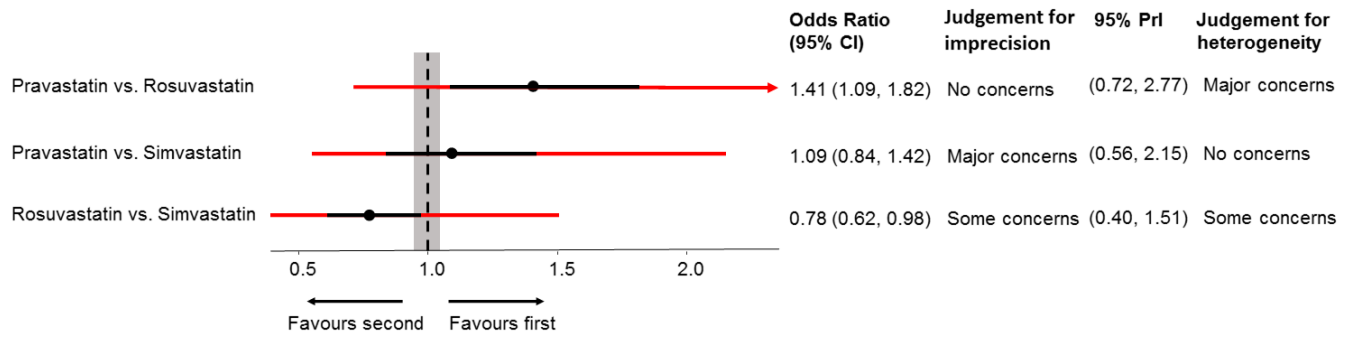

## **Acknowledgements**

The development of the software and part of the presented work was supported by the Campbell Collaboration. ME was supported by special project funding (Grant No. 174281) from the Swiss National Science Foundation. GS, AN, TP were supported by project funding (Grant No. 179158) from the Swiss National Science Foundation. The funders had no role in study design, data collection and analysis, decision to publish, or preparation of the manuscript.



## REFERENCES

1. Zarin W, Veroniki AA, Nincic V, Vafaei A, Reynen E, Motiwala SS, et al. Characteristics and knowledge synthesis approach for 456 network meta-analyses: a scoping review. *BMC Med.* 2017 Jan 5;15(1):3.
2. Guyatt GH, Oxman AD, Vist GE, Kunz R, Falck-Ytter Y, Alonso-Coello P, et al. GRADE: an emerging consensus on rating quality of evidence and strength of recommendations. *BMJ.* 2008 Apr 26;336(7650):924–6.
3. Guyatt G, Oxman AD, Akl EA, Kunz R, Vist G, Brozek J, et al. GRADE guidelines: 1. Introduction-GRADE evidence profiles and summary of findings tables. *J Clin Epidemiol.* 2011 Apr;64(4):383–94.
4. Puhan MA, Schünemann HJ, Murad MH, Li T, Brignardello-Petersen R, Singh JA, et al. A GRADE Working Group approach for rating the quality of treatment effect estimates from network meta-analysis. *BMJ.* 2014;349:g5630.
5. Salanti G, Del Giovane C, Chaimani A, Caldwell DM, Higgins JPT. Evaluating the quality of evidence from a network meta-analysis. *PloS One.* 2014;9(7):e99682.
6. CINeMA: Confidence in Network Meta-Analysis. [Internet]. Institute of Social and Preventive Medicine, University of Bern.; 2017. Available from: [cinema.ispm.ch](http://cinema.ispm.ch)
7. Jansen JP, Trikalinos T, Cappelleri JC, Daw J, Andes S, Eldessouki R, et al. Indirect treatment comparison/network meta-analysis study questionnaire to assess relevance and credibility to inform health care decision making: an ISPOR-AMCP-NPC Good Practice Task Force report. *Value Health J Int Soc Pharmacoeconomics Outcomes Res.* 2014 Mar;17(2):157–73.
8. Hoaglin DC, Hawkins N, Jansen JP, Scott DA, Itzler R, Cappelleri JC, et al. Conducting indirect-treatment-comparison and network-meta-analysis studies: report of the ISPOR Task Force on Indirect Treatment Comparisons Good Research Practices: part 2. *ValueHealth.* 2011 Jun;14(1524–4733 (Electronic)):429–37.
9. Ades AE, Caldwell DM, Reken S, Welton NJ, Sutton AJ, Dias S. Evidence synthesis for decision making 7: a reviewer’s checklist. *MedDecisMaking.* 2013 Jul;33(1552–681X (Electronic)):679–91.
10. Dias S, Sutton AJ, Ades AE, Welton NJ. Evidence synthesis for decision making 2: a generalized linear modeling framework for pairwise and network meta-analysis of randomized controlled trials. *Med Decis Mak Int J Soc Med Decis Mak.* 2013 Jul;33(5):607–17.
11. Siontis GC, Mavridis D, Greenwood JP, Coles B, Nikolakopoulou A, Jüni P, et al. Outcomes of non-invasive diagnostic modalities for the detection of coronary artery disease: network meta-analysis of diagnostic randomised controlled trials. *BMJ.* 2018 Feb 21;360:k504.

12. Cipriani A, Furukawa TA, Salanti G, Chaimani A, Atkinson LZ, Ogawa Y, et al. Comparative efficacy and acceptability of 21 antidepressant drugs for the acute treatment of adults with major depressive disorder: a systematic review and network meta-analysis. *Lancet Lond Engl*. 2018 Feb 20;
13. Naci H, Bruggs J, Ades T. Comparative tolerability and harms of individual statins: a study-level network meta-analysis of 246 955 participants from 135 randomized, controlled trials. *Circ Cardiovasc Qual Outcomes*. 2013 Jul;6(4):390–9.
14. Rucker G, Schwarzer G, Krahn U, König J. netmeta: Network Meta-Analysis using Frequentist Methods. R package version 0.8-0. [Internet]. Available from: <https://CRAN.R-project.org/package=netmeta>
15. Higgins JPT, Altman DG, Gøtzsche PC, Jüni P, Moher D, Oxman AD, et al. The Cochrane Collaboration's tool for assessing risk of bias in randomised trials. *BMJ*. 2011 Oct 18;343:d5928.
16. Higgins JP, Sterne J, Savovic J, Page MJ, Hróbjartsson A, Boutron I, et al. A revised tool for assessing risk of bias in randomized trials. In: *Cochrane Methods Cochrane Database of Systematic Reviews*. Chandler J, McKenzie J, Boutron I, Welch V; 2016. (Issue 10 (Suppl 1)).
17. Guyatt GH, Oxman AD, Vist G, Kunz R, Brozek J, Alonso-Coello P, et al. GRADE guidelines: 4. Rating the quality of evidence--study limitations (risk of bias). *J Clin Epidemiol*. 2011 Apr;64(4):407–15.
18. Brignardello-Petersen R, Bonner A, Alexander PE, Siemieniuk RA, Furukawa TA, Rochwerf B, et al. Advances in the GRADE approach to rate the certainty in estimates from a network meta-analysis. *J Clin Epidemiol*. 2018 Jan;93:36–44.
19. Papakonstantinou T, Nikolakopoulou A, Rucker G, Chaimani A, Schwarzer G, Egger M, et al. Estimating the contribution of studies in network meta-analysis: paths, flows and streams. *F1000Research*. 2018 May 18;7:610.
20. Page MJ, McKenzie JE, Kirkham J, Dwan K, Kramer S, Green S, et al. Bias due to selective inclusion and reporting of outcomes and analyses in systematic reviews of randomised trials of healthcare interventions. *Cochrane Database Syst Rev*. 2014 Oct 1;(10):MR000035.
21. Dwan K, Altman DG, Arnaiz JA, Bloom J, Chan A-W, Cronin E, et al. Systematic review of the empirical evidence of study publication bias and outcome reporting bias. *PloS One*. 2008 Aug 28;3(8):e3081.
22. Dwan K, Gamble C, Williamson PR, Kirkham JJ, Reporting Bias Group. Systematic review of the empirical evidence of study publication bias and outcome reporting bias - an updated review. *PloS One*. 2013;8(7):e66844.
23. Scherer RW, Langenberg P, von Elm E. Full publication of results initially presented in abstracts. *Cochrane Database Syst Rev*. 2007 Apr 18;(2):MR000005.

24. Wager E, Williams P, Project Overcome failure to Publish nEgative fiNDings Consortium. "Hardly worth the effort"? Medical journals' policies and their editors' and publishers' views on trial registration and publication bias: quantitative and qualitative study. *BMJ*. 2013 Sep 6;347:f5248.
25. Stern JM, Simes RJ. Publication bias: evidence of delayed publication in a cohort study of clinical research projects. *BMJ*. 1997 Sep 13;315(7109):640–5.
26. Dickersin K, Chalmers I. Recognizing, investigating and dealing with incomplete and biased reporting of clinical research: from Francis Bacon to the WHO. *J R Soc Med*. 2011 Dec;104(12):532–8.
27. Guyatt GH, Oxman AD, Montori V, Vist G, Kunz R, Brozek J, et al. GRADE guidelines: 5. Rating the quality of evidence--publication bias. *J Clin Epidemiol*. 2011 Dec;64(12):1277–82.
28. Lexchin J, Bero LA, Djulbegovic B, Clark O. Pharmaceutical industry sponsorship and research outcome and quality: systematic review. *BMJ*. 2003 May 31;326(7400):1167–70.
29. Melander H, Ahlqvist-Rastad J, Meijer G, Beermann B. Evidence b(i)ased medicine--selective reporting from studies sponsored by pharmaceutical industry: review of studies in new drug applications. *BMJ*. 2003 May 31;326(7400):1171–3.
30. Turner EH, Matthews AM, Linardatos E, Tell RA, Rosenthal R. Selective publication of antidepressant trials and its influence on apparent efficacy. *N Engl J Med*. 2008 Jan 17;358(3):252–60.
31. Chaimani A, Salanti G. Using network meta-analysis to evaluate the existence of small-study effects in a network of interventions. *Res Synth Methods*. 2012;3(2):161–176.
32. Chaimani A, Salanti G. Visualizing assumptions and results in network meta-analysis: The network graphs package. 2015;15(4):905–50.
33. Mavridis D, Efthimiou O, Leucht S, Salanti G. Publication bias and small-study effects magnified effectiveness of antipsychotics but their relative ranking remained invariant. *J Clin Epidemiol*. 2015 Jun 5;
34. Mavridis D, Sutton A, Cipriani A, Salanti G. A fully Bayesian application of the Copas selection model for publication bias extended to network meta-analysis. *Stat Med*. 2013 Jan 15;32(1):51–66.
35. Guyatt GH, Oxman AD, Kunz R, Woodcock J, Brozek J, Helfand M, et al. GRADE guidelines: 8. Rating the quality of evidence--indirectness. *J Clin Epidemiol*. 2011 Dec;64(12):1303–10.
36. Caldwell DM, Ades AE, Higgins JPT. Simultaneous comparison of multiple treatments: combining direct and indirect evidence. *BMJ*. 2005 Oct 15;331(7521):897–900.

37. Naci H, Brugts J, Ades T. Comparative tolerability and harms of individual statins: a study-level network meta-analysis of 246 955 participants from 135 randomized, controlled trials. *Circ Cardiovasc Qual Outcomes*. 2013 Jul;6(4):390–9.
38. Guyatt GH, Oxman AD, Kunz R, Woodcock J, Brozek J, Helfand M, et al. GRADE guidelines: 7. Rating the quality of evidence--inconsistency. *J Clin Epidemiol*. 2011 Dec;64(12):1294–302.
39. Dias S, Welton NJ, Caldwell DM, Ades AE. Checking consistency in mixed treatment comparison meta-analysis. *Stat Med*. 2010 Mar 30;29(7–8):932–44.
40. Dias S, Welton NJ, Sutton AJ, Caldwell DM, Lu G, Ades AE. Evidence synthesis for decision making 4: inconsistency in networks of evidence based on randomized controlled trials. *Med Decis Mak Int J Soc Med Decis Mak*. 2013;33(5):641–56.
41. White IR, Barrett JK, Jackson D, Higgins JPT. Consistency and inconsistency in network meta-analysis: model estimation using multivariate meta-regression. *Res Synth Methods*. 2012 Jun;3(2):111–25.
42. Higgins JPT, Jackson D, Barrett JK, Lu G, Ades AE, White IR. Consistency and inconsistency in network meta-analysis: concepts and models for multi-arm studies. *Res Synth Methods*. 2012 Jun;3(2):98–110.
43. Turner RM, Davey J, Clarke MJ, Thompson SG, Higgins JP. Predicting the extent of heterogeneity in meta-analysis, using empirical data from the Cochrane Database of Systematic Reviews. *Int J Epidemiol*. 2012 Jun;41(3):818–27.
44. Rhodes KM, Turner RM, Higgins JPT. Predictive distributions were developed for the extent of heterogeneity in meta-analyses of continuous outcome data. *J Clin Epidemiol*. 2015 Jan;68(1):52–60.
45. Lu G, Ades AE. Assessing Evidence Inconsistency in Mixed Treatment Comparisons. *J Am Stat Assoc*. 2006 Jun 1;101(474):447–59.
46. Lu G, Ades A. Modeling between-trial variance structure in mixed treatment comparisons. *Biostat Oxf Engl*. 2009 Oct;10(4):792–805.
47. Bucher HC, Guyatt GH, Griffith LE, Walter SD. The results of direct and indirect treatment comparisons in meta-analysis of randomized controlled trials. *J Clin Epidemiol*. 1997 Jun;50(6):683–91.
48. Dias S, Welton NJ, Sutton AJ, Caldwell DM, Lu G, Ades AE. Inconsistency in Networks of Evidence Based on Randomised Controlled Trials [Internet]. London: National Institute for Health and Care Excellence (NICE); 2014. (NICE Decision Support Unit Technical Support Documents). Available from: <http://www.ncbi.nlm.nih.gov/books/NBK310372/>

49. Veroniki AA, Mavridis D, Higgins JP, Salanti G. Characteristics of a loop of evidence that affect detection and estimation of inconsistency: a simulation study. *BMC Med Res Methodol.* 2014 Sep 19;14:106.
50. Song F, Clark A, Bachmann MO, Maas J. Simulation evaluation of statistical properties of methods for indirect and mixed treatment comparisons. *BMC Med Res Methodol.* 2012 Sep 12;12:138.
51. Salanti G, Del Giovane C, Chaimani A, Caldwell DM, Higgins JPT. Evaluating the quality of evidence from a network meta-analysis. *PLoS One.* 2014;9(7):e99682.
52. Brignardello-Petersen R, Bonner A, Alexander PE, Siemieniuk RA, Furukawa TA, Rochwerg B, et al. Advances in the GRADE approach to rate the certainty in estimates from a network meta-analysis. *J Clin Epidemiol.* 2018 Jan;93:36–44.
53. Puhan MA, Schünemann HJ, Murad MH, Li T, Brignardello-Petersen R, Singh JA, et al. A GRADE Working Group approach for rating the quality of treatment effect estimates from network meta-analysis. *BMJ.* 2014 Sep 24;349:g5630.
54. Caldwell DM, Ades AE, Dias S, Watkins S, Li T, Taske N, et al. A threshold analysis assessed the credibility of conclusions from network meta-analysis. *J Clin Epidemiol.* 2016 Dec;80:68–76.
55. Kanters S, Ford N, Druyts E, Thorlund K, Mills EJ, Bansback N. Use of network meta-analysis in clinical guidelines. *Bull World Health Organ.* 2016 Oct 1;94(10):782–4.
56. Petropoulou M, Nikolakopoulou A, Veroniki A-A, Rios P, Vafaei A, Zarin W, et al. Bibliographic study showed improving statistical methodology of network meta-analyses published between 1999 and 2015. *J Clin Epidemiol.* 2017 Feb;82:20–8.
57. Zarin W, Veroniki AA, Nincic V, Vafaei A, Reynen E, Motiwala SS, et al. Characteristics and knowledge synthesis approach for 456 network meta-analyses: a scoping review. *BMC Med.* 2017 05;15(1):3.
58. Furukawa TA, Salanti G, Atkinson LZ, Leucht S, Ruhe HG, Turner EH, et al. Comparative efficacy and acceptability of first-generation and second-generation antidepressants in the acute treatment of major depression: protocol for a network meta-analysis. *BMJ Open.* 2016;6(7):e010919.
59. Rucker G, Schwarzer G, Krahn U, König J. netmeta: Network Meta-Analysis using Frequentist Methods [Internet]. 2016 [cited 2016 Sep 5]. Available from: <https://cran.r-project.org/web/packages/netmeta/index.html>

## SUPPLEMENTARY MATERIAL

**Table S1 Data from Network of randomised controlled trials comparing non-invasive diagnostic strategies for the detection of coronary artery disease in patients with low risk acute coronary syndrome. The data was originally published by Siontis et al.**

| id | trial                     | group              | n    | r  | rob | t             |
|----|---------------------------|--------------------|------|----|-----|---------------|
| 1  | BEACONR1                  | Anatomical testing | 250  | 41 | 1   | CCTA          |
| 1  | BEACONR1                  | Standard care      | 250  | 31 | 1   | Standard care |
| 2  | Levsky JM., et al.R2      | Anatomical testing | 200  | 30 | 1   | CCTA          |
| 2  | Levsky JM., et al.R2      | Functional testing | 200  | 32 | 1   | SPECT-MPI     |
| 3  | CT-COMPARER3              | Anatomical testing | 322  | 26 | 3   | CCTA          |
| 3  | CT-COMPARER3              | Functional testing | 240  | 9  | 3   | Exercise ECG  |
| 4  | CATCHR4,R5                | Anatomical testing | 299  | 49 | 3   | CCTA          |
| 4  | CATCHR4,R5                | Standard care      | 301  | 36 | 3   | Standard care |
| 5  | Lim SH., et al.R6         | Functional testing | 1126 | 73 | 2   | SPECT-MPI     |
| 5  | Lim SH., et al.R6         | Standard care      | 564  | 56 | 2   | Standard care |
| 6  | Miller CD., et al.R7      | CMR                | 52   | 5  | 2   | CMR           |
| 6  | Miller CD., et al.R7      | Standard care      | 53   | 11 | 2   | Standard care |
| 7  | ROMICAT-IIR8              | Anatomical testing | 501  | 59 | 3   | CCTA          |
| 7  | ROMICAT-IIR8              | Standard care      | 499  | 40 | 3   | Standard care |
| 8  | ACRIN-PAR9,R10            | Anatomical testing | 929  | 69 | 1   | CCTA          |
| 8  | ACRIN-PAR9,R10            | Standard care      | 463  | 32 | 1   | Standard care |
| 9  | CT-STATR11                | Anatomical testing | 375  | 26 | 1   | CCTA          |
| 9  | CT-STATR11                | Functional testing | 374  | 22 | 1   | SPECT-MPI     |
| 10 | Miller AH., et al.R12     | Anatomical testing | 30   | 4  | 2   | CCTA          |
| 10 | Miller AH., et al.R12     | Standard care      | 30   | 4  | 2   | Standard care |
| 11 | Miller CD., et al.R13,R14 | CMR                | 52   | 8  | 3   | CMR           |
| 11 | Miller CD., et al.R13,R14 | Standard care      | 57   | 19 | 3   | Standard care |

|    |                          |                    |      |     |   |               |
|----|--------------------------|--------------------|------|-----|---|---------------|
| 12 | Nucifora G., et al.R15   | Functional testing | 77   | 5   | 1 | Stress Echo   |
| 12 | Nucifora G., et al.R15   | Functional testing | 75   | 9   | 1 | Exercise ECG  |
| 12 | Nucifora G., et al.R15   | Standard care      | 55   | 8   | 1 | Standard care |
| 13 | Chang SA., et al.R16     | Anatomical testing | 133  | 47  | 1 | CCTA          |
| 13 | Chang SA., et al.R16     | Standard care      | 133  | 57  | 1 | Standard care |
| 14 | Goldstein JA., et al.R17 | Anatomical testing | 99   | 12  | 1 | CCTA          |
| 14 | Goldstein JA., et al.R17 | Standard care      | 98   | 7   | 1 | Standard care |
| 15 | Jeetley P., et al.R18    | Functional testing | 215  | 41  | 1 | Stress Echo   |
| 15 | Jeetley P., et al.R18    | Functional testing | 218  | 72  | 1 | Exercise ECG  |
| 16 | Nucifora G., et al.R19   | Functional testing | 110  | 6   | 2 | Stress Echo   |
| 16 | Nucifora G., et al.R19   | Functional testing | 89   | 6   | 2 | Exercise ECG  |
| 17 | Jeetley P., et al.R20    | Functional testing | 148  | 21  | 2 | Stress Echo   |
| 17 | Jeetley P., et al.R20    | Functional testing | 154  | 36  | 2 | Exercise ECG  |
| 18 | Udelson JE., et al.R21   | Functional testing | 1215 | 156 | 2 | SPECT-MPI     |
| 18 | Udelson JE., et al.R21   | Standard care      | 1260 | 162 | 2 | Standard care |

**Table S2 Number of "one-step loops" providing indirect evidence for NMA relative treatment effects between treatment comparisons for the network of antidepressants.**

| <b>Number of "one-step loops" providing indirect evidence</b> | <b>Nr of treatment comparisons</b> | <b>Cumulative frequency</b> | <b>% Cumulative frequency</b> |
|---------------------------------------------------------------|------------------------------------|-----------------------------|-------------------------------|
| 0                                                             | 3                                  | 3                           | 2%                            |
| 1                                                             | 16                                 | 19                          | 14%                           |
| 2                                                             | 18                                 | 37                          | 28%                           |
| 3                                                             | 32                                 | 69                          | 51%                           |
| 4                                                             | 30                                 | 99                          | 74%                           |
| 5                                                             | 19                                 | 118                         | 88%                           |
| 6                                                             | 13                                 | 131                         | 98%                           |
| 7                                                             | 13                                 | 144                         | 107%                          |
| 8                                                             | 3                                  | 147                         | 110%                          |
| 10                                                            | 1                                  | 148                         | 110%                          |
| 11                                                            | 1                                  | 149                         | 111%                          |
| 12                                                            | 3                                  | 152                         | 113%                          |
| 13                                                            | 1                                  | 153                         | 114%                          |



**Table S3 Average contribution to NMA relative treatment effects from direct evidence and indirect evidence via intermediate comparators (steps). The “one-step loop” provides one-step indirect comparison via a single common treatment.**

| Source of evidence |          | % Contribution |
|--------------------|----------|----------------|
| Direct evidence    |          | 11.1%          |
| Indirect evidence  | 1 step   | 56.1%          |
|                    | 2 steps  | 84.3%          |
|                    | 3 steps  | 95.0%          |
|                    | 4 steps  | 98.0%          |
|                    | 5 steps  | 99.1%          |
|                    | 6 steps  | 99.5%          |
|                    | 7 steps  | 99.7%          |
|                    | 8 steps  | 99.9%          |
|                    | 9 steps  | 100.0%         |
|                    | 10 steps | 100.0%         |
|                    | 11 steps | 100.0%         |
|                    | 12 steps | 100.0%         |
| 13 steps           | 100.0%   |                |

**Table S4. Data from the network of randomised controlled trials comparing adverse effects of statins. The data was originally published by Naci et al. id: id of the study, t: treatment name, r: number of adverse effects, n: sample size.**

| year | study                      | id | t            | r   | n    |
|------|----------------------------|----|--------------|-----|------|
| 1993 | PMSG                       | 1  | pravastatin  | 25  | 530  |
| 1993 | PMSG                       | 1  | placebo      | 33  | 532  |
| 1993 | SPSG                       | 2  | simvastatin  | 5   | 275  |
| 1993 | SPSG                       | 2  | pravastatin  | 5   | 275  |
| 1993 | LPSG                       | 3  | lovastatin   | 10  | 339  |
| 1993 | LPSG                       | 3  | pravastatin  | 8   | 333  |
| 1993 | MARS                       | 4  | lovastatin   | 3   | 123  |
| 1993 | MARS                       | 4  | placebo      | 6   | 124  |
| 1994 | 4S                         | 5  | placebo      | 129 | 2223 |
| 1994 | 4S                         | 5  | simvastatin  | 126 | 2221 |
| 1994 | PMSG-Diabetes              | 6  | pravastatin  | 2   | 167  |
| 1994 | PMSG-Diabetes              | 6  | placebo      | 9   | 158  |
| 1994 | EXCEL                      | 7  | placebo      | 100 | 1663 |
| 1994 | EXCEL                      | 7  | lovastatin   | 329 | 6582 |
| 1994 | OCS                        | 8  | simvastatin  | 18  | 414  |
| 1994 | OCS                        | 8  | placebo      | 6   | 207  |
| 1995 | Jacobson                   | 9  | pravastatin  | 9   | 182  |
| 1995 | Jacobson                   | 9  | placebo      | 1   | 63   |
| 1995 | REGRESS                    | 10 | pravastatin  | 16  | 450  |
| 1995 | REGRESS                    | 10 | placebo      | 10  | 434  |
| 1995 | KAPS                       | 11 | placebo      | 12  | 223  |
| 1995 | KAPS                       | 11 | pravastatin  | 8   | 224  |
| 1995 | WOSCOPS                    | 12 | placebo      | 106 | 3293 |
| 1995 | WOSCOPS                    | 12 | pravastatin  | 116 | 3302 |
| 1995 | Guillen                    | 13 | placebo      | 1   | 74   |
| 1995 | Guillen                    | 13 | pravastatin  | 0   | 76   |
| 1996 | SHIGA<br>Pravastatin study | 14 | pravastatin  | 2   | 102  |
| 1996 | SHIGA<br>Pravastatin study | 14 | placebo      | 0   | 105  |
| 1996 | CARE                       | 15 | placebo      | 74  | 2078 |
| 1996 | CARE                       | 15 | pravastatin  | 45  | 2081 |
| 1996 | QLMG                       | 16 | lovastatin   | 3   | 211  |
| 1996 | QLMG                       | 16 | pravastatin  | 4   | 215  |
| 1996 | CHESS                      | 17 | simvastatin  | 27  | 453  |
| 1996 | CHESS                      | 17 | atorvastatin | 65  | 464  |
| 1997 | Bertolini                  | 18 | atorvastatin | 7   | 227  |
| 1997 | Bertolini                  | 18 | pravastatin  | 2   | 78   |
| 1997 | ASG-I                      | 19 | atorvastatin | 16  | 529  |
| 1997 | ASG-I                      | 19 | lovastatin   | 5   | 120  |
| 1998 | AFCAPS-<br>TexCAPS         | 20 | placebo      | 455 | 3301 |

|      |                    |    |              |     |      |
|------|--------------------|----|--------------|-----|------|
| 1998 | AFCAPS-<br>TexCAPS | 20 | lovastatin   | 449 | 3304 |
| 1998 | Brown              | 21 | atorvastatin | 3   | 78   |
| 1998 | Brown              | 21 | fluvastatin  | 4   | 76   |
| 1998 | Brown              | 21 | lovastatin   | 2   | 78   |
| 1998 | Brown              | 21 | simvastatin  | 2   | 76   |
| 1999 | TARGET<br>TANGIBLE | 22 | atorvastatin | 89  | 1897 |
| 1999 | TARGET<br>TANGIBLE | 22 | simvastatin  | 45  | 959  |
| 1999 | Riegger            | 23 | fluvastatin  | 11  | 187  |
| 1999 | Riegger            | 23 | placebo      | 8   | 178  |
| 1999 | IQLMG              | 24 | simvastatin  | 7   | 194  |
| 1999 | IQLMG              | 24 | pravastatin  | 7   | 193  |
| 1999 | FLARE              | 25 | fluvastatin  | 4   | 409  |
| 1999 | FLARE              | 25 | placebo      | 11  | 425  |
| 2000 | Barter             | 26 | atorvastatin | 48  | 691  |
| 2000 | Barter             | 26 | simvastatin  | 24  | 337  |
| 2000 | Farnier            | 27 | atorvastatin | 1   | 109  |
| 2000 | Farnier            | 27 | simvastatin  | 1   | 163  |
| 2000 | Stein              | 28 | placebo      | 0   | 130  |
| 2000 | Stein              | 28 | simvastatin  | 1   | 260  |
| 2000 | Recto              | 29 | simvastatin  | 1   | 251  |
| 2000 | Recto              | 29 | atorvastatin | 5   | 251  |
| 2000 | Gentile            | 30 | atorvastatin | 1.5 | 85   |
| 2000 | Gentile            | 30 | simvastatin  | 0.5 | 79   |
| 2000 | Gentile            | 30 | pravastatin  | 1.5 | 82   |
| 2000 | Gentile            | 30 | lovastatin   | 1.5 | 81   |
| 2000 | Gentile            | 30 | placebo      | 0.5 | 87   |
| 2001 | ASSET              | 31 | atorvastatin | 7   | 730  |
| 2001 | ASSET              | 31 | simvastatin  | 7   | 694  |
| 2001 | MIRACL             | 32 | placebo      | 33  | 1548 |
| 2001 | MIRACL             | 32 | atorvastatin | 40  | 1538 |
| 2001 | Paoletti           | 33 | rosuvastatin | 8   | 230  |
| 2001 | Paoletti           | 33 | pravastatin  | 3   | 136  |
| 2001 | Paoletti           | 33 | simvastatin  | 1   | 129  |
| 2001 | Andrews            | 34 | atorvastatin | 129 | 1902 |
| 2001 | Andrews            | 34 | fluvastatin  | 64  | 477  |
| 2001 | Andrews            | 34 | lovastatin   | 42  | 476  |
| 2001 | Andrews            | 34 | pravastatin  | 20  | 462  |
| 2001 | Andrews            | 34 | simvastatin  | 39  | 468  |
| 2002 | GREACE             | 35 | atorvastatin | 6   | 800  |
| 2002 | GREACE             | 35 | placebo      | 3   | 800  |
| 2002 | Davidson           | 36 | placebo      | 3   | 70   |
| 2002 | Davidson           | 36 | simvastatin  | 14  | 263  |
| 2002 | FLORIDA            | 37 | fluvastatin  | 30  | 265  |
| 2002 | FLORIDA            | 37 | placebo      | 37  | 275  |

|      |                 |    |              |     |      |
|------|-----------------|----|--------------|-----|------|
| 2002 | LIPS            | 38 | fluvastatin  | 174 | 844  |
| 2002 | LIPS            | 38 | placebo      | 196 | 833  |
| 2002 | PROSPER         | 39 | placebo      | 116 | 1913 |
| 2002 | PROSPER         | 39 | pravastatin  | 107 | 2891 |
| 2002 | Olsson          | 40 | rosuvastatin | 16  | 272  |
| 2002 | Olsson          | 40 | atorvastatin | 12  | 140  |
| 2002 | Davidson        | 41 | placebo      | 7   | 132  |
| 2002 | Davidson        | 41 | rosuvastatin | 10  | 259  |
| 2002 | Davidson        | 41 | atorvastatin | 4   | 128  |
| 2002 | CHALLENGE       | 42 | atorvastatin | 17  | 846  |
| 2002 | CHALLENGE       | 42 | simvastatin  | 10  | 848  |
| 2003 | Ballantyne      | 43 | atorvastatin | 13  | 248  |
| 2003 | Ballantyne      | 43 | placebo      | 3   | 60   |
| 2003 | ADVOCATE        | 44 | atorvastatin | 6   | 82   |
| 2003 | ADVOCATE        | 44 | simvastatin  | 2   | 76   |
| 2003 | Bruckert        | 45 | fluvastatin  | 13  | 607  |
| 2003 | Bruckert        | 45 | placebo      | 8   | 622  |
| 2003 | Kerzner         | 46 | lovastatin   | 10  | 220  |
| 2003 | Kerzner         | 46 | placebo      | 5   | 64   |
| 2003 | Melani          | 47 | pravastatin  | 3   | 205  |
| 2003 | Melani          | 47 | placebo      | 5   | 65   |
| 2003 | TREAT TO TARGET | 48 | atorvastatin | 20  | 552  |
| 2003 | TREAT TO TARGET | 48 | simvastatin  | 14  | 535  |
| 2003 | HeFH            | 49 | rosuvastatin | 16  | 436  |
| 2003 | HeFH            | 49 | atorvastatin | 6   | 187  |
| 2003 | Mohler          | 50 | atorvastatin | 16  | 240  |
| 2003 | Mohler          | 50 | placebo      | 10  | 114  |
| 2003 | Davidson        | 51 | lovastatin   | 21  | 501  |
| 2003 | Davidson        | 51 | fluvastatin  | 22  | 337  |
| 2003 | STELLAR         | 52 | rosuvastatin | 9   | 480  |
| 2003 | STELLAR         | 52 | atorvastatin | 25  | 641  |
| 2003 | STELLAR         | 52 | simvastatin  | 19  | 655  |
| 2003 | STELLAR         | 52 | pravastatin  | 11  | 492  |
| 2004 | CARDS           | 53 | placebo      | 145 | 1410 |
| 2004 | CARDS           | 53 | atorvastatin | 122 | 1428 |
| 2004 | Bays            | 54 | simvastatin  | 31  | 622  |
| 2004 | Bays            | 54 | placebo      | 2   | 148  |
| 2004 | PREVENT IT      | 55 | placebo      | 22  | 431  |
| 2004 | PREVENT IT      | 55 | pravastatin  | 13  | 433  |
| 2004 | Durazzo         | 56 | atorvastatin | 1   | 50   |
| 2004 | Durazzo         | 56 | placebo      | 0   | 50   |
| 2004 | Goldberg        | 57 | placebo      | 2   | 93   |
| 2004 | Goldberg        | 57 | simvastatin  | 7   | 349  |
| 2004 | ALLIANCE        | 58 | atorvastatin | 75  | 1217 |

|      |                     |    |              |     |      |
|------|---------------------|----|--------------|-----|------|
| 2004 | ALLIANCE            | 58 | placebo      | 3   | 1225 |
| 2004 | PCS                 | 59 | pravastatin  | 5   | 54   |
| 2004 | PCS                 | 59 | placebo      | 0   | 66   |
| 2004 | REVERSAL            | 60 | pravastatin  | 22  | 327  |
| 2004 | REVERSAL            | 60 | atorvastatin | 21  | 327  |
| 2004 | DISCOVERY           | 61 | rosuvastatin | 24  | 686  |
| 2004 | DISCOVERY           | 61 | atorvastatin | 9   | 338  |
| 2004 | Schwartz            | 62 | rosuvastatin | 12  | 255  |
| 2004 | Schwartz            | 62 | atorvastatin | 6   | 128  |
| 2004 | Brown               | 63 | rosuvastatin | 22  | 239  |
| 2004 | Brown               | 63 | pravastatin  | 11  | 118  |
| 2004 | Brown               | 63 | simvastatin  | 9   | 120  |
| 2005 | BELLES              | 64 | atorvastatin | 43  | 305  |
| 2005 | BELLES              | 64 | pravastatin  | 21  | 309  |
| 2005 | DISCOVERY-<br>Penta | 65 | rosuvastatin | 17  | 358  |
| 2005 | DISCOVERY-<br>Penta | 65 | atorvastatin | 7   | 383  |
| 2005 | IDEAL               | 66 | simvastatin  | 186 | 4449 |
| 2005 | IDEAL               | 66 | atorvastatin | 426 | 4439 |
| 2005 | CORALL              | 67 | rosuvastatin | 9   | 131  |
| 2005 | CORALL              | 67 | atorvastatin | 11  | 132  |
| 2005 | URANUS              | 68 | rosuvastatin | 3   | 232  |
| 2005 | URANUS              | 68 | atorvastatin | 7   | 233  |
| 2005 | COMETS              | 69 | rosuvastatin | 4   | 165  |
| 2005 | COMETS              | 69 | atorvastatin | 4   | 157  |
| 2005 | COMETS              | 69 | placebo      | 3   | 79   |
| 2006 | DISCOVERY-<br>Alpha | 70 | rosuvastatin | 23  | 555  |
| 2006 | DISCOVERY-<br>Alpha | 70 | atorvastatin | 14  | 382  |
| 2006 | SPARCL              | 71 | atorvastatin | 415 | 2365 |
| 2006 | SPARCL              | 71 | placebo      | 342 | 2366 |
| 2006 | ASPEN               | 72 | atorvastatin | 33  | 1211 |
| 2006 | ASPEN               | 72 | placebo      | 38  | 1199 |
| 2006 | PULSAR              | 73 | rosuvastatin | 14  | 504  |
| 2006 | PULSAR              | 73 | atorvastatin | 11  | 492  |
| 2006 | ARIES               | 74 | rosuvastatin | 13  | 391  |
| 2006 | ARIES               | 74 | atorvastatin | 10  | 383  |
| 2006 | STARSHIP            | 75 | rosuvastatin | 11  | 357  |
| 2006 | STARSHIP            | 75 | atorvastatin | 5   | 339  |
| 2006 | MERCURY II          | 76 | rosuvastatin | 15  | 392  |
| 2006 | MERCURY II          | 76 | atorvastatin | 19  | 798  |
| 2006 | MERCURY II          | 76 | simvastatin  | 25  | 803  |
| 2007 | METEOR              | 77 | rosuvastatin | 79  | 702  |
| 2007 | METEOR              | 77 | placebo      | 22  | 282  |
| 2007 | SAGE                | 78 | atorvastatin | 48  | 446  |

|      |                    |    |              |     |      |
|------|--------------------|----|--------------|-----|------|
| 2007 | SAGE               | 78 | pravastatin  | 46  | 445  |
| 2007 | Kyeong             | 79 | rosuvastatin | 2   | 60   |
| 2007 | Kyeong             | 79 | atorvastatin | 3   | 57   |
| 2007 | ASTRONOMER         | 80 | rosuvastatin | 25  | 134  |
| 2007 | ASTRONOMER         | 80 | placebo      | 26  | 135  |
| 2007 | CORONA             | 81 | placebo      | 302 | 2497 |
| 2007 | CORONA             | 81 | rosuvastatin | 241 | 2514 |
| 2007 | Lewis              | 82 | pravastatin  | 11  | 163  |
| 2007 | Lewis              | 82 | placebo      | 16  | 163  |
| 2007 | ANDROMEDA          | 83 | rosuvastatin | 15  | 248  |
| 2007 | ANDROMEDA          | 83 | atorvastatin | 13  | 246  |
| 2007 | POLARIS            | 84 | rosuvastatin | 22  | 432  |
| 2007 | POLARIS            | 84 | atorvastatin | 27  | 439  |
| 2007 | Asia<br>DISCOVERY- | 85 | rosuvastatin | 21  | 950  |
| 2007 | Asia<br>DISCOVERY- | 85 | atorvastatin | 10  | 472  |
| 2007 | SOLAR              | 86 | rosuvastatin | 15  | 542  |
| 2007 | SOLAR              | 86 | atorvastatin | 20  | 544  |
| 2007 | SOLAR              | 86 | simvastatin  | 20  | 546  |
| 2007 | IRIS               | 87 | rosuvastatin | 14  | 371  |
| 2007 | IRIS               | 87 | atorvastatin | 7   | 369  |
| 2008 | GISSI-HF           | 88 | rosuvastatin | 104 | 2285 |
| 2008 | GISSI-HF           | 88 | placebo      | 91  | 2289 |
| 2008 | ECLIPSE            | 89 | rosuvastatin | 41  | 522  |
| 2008 | ECLIPSE            | 89 | atorvastatin | 36  | 514  |
| 2008 | SUBARU             | 90 | atorvastatin | 0   | 213  |
| 2008 | SUBARU             | 90 | rosuvastatin | 8   | 214  |
| 2008 | Beta<br>DISCOVERY- | 91 | rosuvastatin | 24  | 334  |
| 2008 | Beta<br>DISCOVERY- | 91 | simvastatin  | 7   | 170  |
| 2008 | Sdringola          | 92 | placebo      | 3   | 73   |
| 2008 | Sdringola          | 92 | atorvastatin | 1   | 72   |
| 2009 | SPACE ROCKET       | 93 | rosuvastatin | 20  | 633  |
| 2009 | SPACE ROCKET       | 93 | simvastatin  | 9   | 630  |
| 2009 | Ose                | 94 | simvastatin  | 4   | 219  |
| 2009 | Ose                | 94 | pitavastatin | 21  | 638  |
| 2010 | CENTAURUS          | 95 | rosuvastatin | 15  | 437  |
| 2010 | CENTAURUS          | 95 | atorvastatin | 17  | 450  |
| 2010 | Acala              | 96 | placebo      | 0   | 70   |
| 2010 | Acala              | 96 | pravastatin  | 2   | 61   |
| 2011 | SATURN             | 97 | atorvastatin | 48  | 519  |
| 2011 | SATURN             | 97 | rosuvastatin | 45  | 520  |
| 2011 | Eriksson           | 98 | pitavastatin | 9   | 236  |
| 2011 | Eriksson           | 98 | simvastatin  | 6   | 119  |
| 2011 | Gumprecht          | 99 | pitavastatin | 8   | 275  |

|      |           |     |              |    |     |
|------|-----------|-----|--------------|----|-----|
| 2011 | Gumprecht | 99  | atorvastatin | 6  | 137 |
| 2011 | PATROL    | 100 | atorvastatin | 13 | 101 |
| 2011 | PATROL    | 100 | rosuvastatin | 10 | 100 |
| 2011 | PATROL    | 100 | pitavastatin | 12 | 101 |
| 2012 | LUNAR     | 101 | rosuvastatin | 26 | 499 |
| 2012 | LUNAR     | 101 | atorvastatin | 25 | 257 |

**Table S5. NMA results from the network of randomised controlled trials comparing adverse effects of statins. Odds ratios and their 95% confidence intervals are presented. Odds ratios less than 1 favor the treatment specified in the row.**

|                         |                         |                         |                         |                         |                         |                         |                         |
|-------------------------|-------------------------|-------------------------|-------------------------|-------------------------|-------------------------|-------------------------|-------------------------|
| <b>Atorvastatin</b>     | 0.894<br>(0.637, 1.255) | 1.196<br>(0.868, 1.647) | 1.127<br>(0.637, 1.994) | 1.073<br>(0.890, 1.294) | 1.418<br>(1.126, 1.785) | 1.007<br>(0.848, 1.196) | 1.297<br>(1.065, 1.580) |
| 1.119<br>(0.797, 1.571) | <b>Fluvastatin</b>      | 1.338<br>(0.915, 1.956) | 1.261<br>(0.655, 2.426) | 1.201<br>(0.879, 1.640) | 1.586<br>(1.109, 2.268) | 1.127<br>(0.787, 1.612) | 1.451<br>(1.011, 2.083) |
| 0.836<br>(0.607, 1.152) | 0.747<br>(0.511, 1.093) | <b>Lovastatin</b>       | 0.942<br>(0.494, 1.797) | 0.897<br>(0.668, 1.206) | 1.185<br>(0.849, 1.655) | 0.842<br>(0.599, 1.184) | 1.085<br>(0.768, 1.532) |
| 0.887<br>(0.501, 1.570) | 0.793<br>(0.412, 1.526) | 1.061<br>(0.557, 2.023) | <b>Pitavastatin</b>     | 0.952<br>(0.528, 1.718) | 1.258<br>(0.687, 2.305) | 0.893<br>(0.499, 1.598) | 1.151<br>(0.648, 2.043) |
| 0.932<br>(0.773, 1.123) | 0.833<br>(0.610, 1.138) | 1.114<br>(0.829, 1.498) | 1.050<br>(0.582, 1.895) | <b>Placebo</b>          | 1.321<br>(1.070, 1.632) | 0.938<br>(0.759, 1.160) | 1.209<br>(0.960, 1.522) |
| 0.705<br>(0.560, 0.888) | 0.630<br>(0.441, 0.902) | 0.844<br>(0.604, 1.178) | 0.795 (0.434,<br>1.457) | 0.757<br>(0.613, 0.935) | <b>Pravastatin</b>      | 0.710<br>(0.549, 0.918) | 0.915<br>(0.702, 1.193) |
| 0.993<br>(0.836, 1.179) | 0.888<br>(0.620, 1.270) | 1.188<br>(0.844, 1.671) | 1.119<br>(0.626, 2.002) | 1.066<br>(0.862, 1.317) | 1.408<br>(1.089, 1.821) | <b>Rosuvastatin</b>     | 1.288<br>(1.024, 1.621) |
| 0.771<br>(0.633, 0.939) | 0.689<br>(0.480, 0.989) | 0.922<br>(0.653, 1.302) | 0.869<br>(0.489, 1.542) | 0.827<br>(0.657, 1.041) | 1.093<br>(0.839, 1.424) | 0.776<br>(0.617, 0.977) | <b>Simvastatin</b>      |



**Table S6. Results from SIDE splitting for three network comparisons of the network of statins. OR: odds ratio. SIDE: separate indirect from direct approach.**

| Comparison                      | Direct OR | Indirect OR | Ratio of ORs | z-value | p-value |
|---------------------------------|-----------|-------------|--------------|---------|---------|
| Pravastatin versus rosuvastatin | 0.98      | 0.67        | 1.47         | 1.06    | 0.29    |
| Pravastatin versus simvastatin  | 0.84      | 0.95        | 0.89         | -0.42   | 0.67    |
| Rosuvastatin versus simvastatin | 1.23      | 1.32        | 0.93         | -0.27   | 0.78    |
